1 **Classification:**

2 **BIOLOGICAL SCIENCES: Cell Biology**

3

4 **Ras Inhibitor CAPRI Enables Neutrophils to Chemotax Through a Higher-Concentration**  
5 **Range of Gradients**

6

7 **Xuehua Xu<sup>1</sup>, Xi Wen, Amer Moosa, Smit Bhimani, and Tian Jin**

8

9 Chemotaxis Signaling Section, Laboratory of Immunogenetics, National Institute of Allergy and  
10 Infectious Diseases, National Institutes of Health, 5625 Fishers Lane, Rockville, MD 20852,  
11 USA.

12

13 <sup>1</sup>To whom correspondence may be addressed. Email: [xxu@niaid.nih.gov](mailto:xxu@niaid.nih.gov)

14

15 **Key Words:**

16 Chemotaxis, neutrophils, G protein-coupled receptor (GPCR), adaptation, Ras, Ras guanine  
17 nucleotide exchange factor (Ras GEF), Ras GTPase-activating proteins (RasGAPs), polarity,  
18 directional cell migration.

19

20 **Author contributions:** X.X. designed research; X.X., X.W., A.M., and S.B. performed research  
21 and analyzed data; X.X. and T.J. wrote the paper.

22

23 The authors declare no competing interest.

24 **Abstract**

25 Neutrophils sense and migrate through an enormous range of chemoattractant gradients through

26 adaptation. Here, we reveal that, in human neutrophils, Calcium-promoted Ras inactivator

27 (CAPRI) locally controls the GPCR-stimulated Ras adaptation. Human neutrophils lacking

28 CAPRI (*capri*<sup>kd</sup>) exhibit chemoattractant-induced non-adaptive Ras activation; significantly

29 increased phosphorylation of AKT, GSK3 $\alpha$ /3 $\beta$ , and cofilin; and excessive actin polymerization.

30 *capri*<sup>kd</sup> cells display defective chemotaxis in response to high-concentration gradients but exhibit

31 improved chemotaxis in low- or subsensitive-concentration gradients of various chemoattractants

32 as a result of their enhanced sensitivity. Taken together, our data reveal that CAPRI controls

33 GPCR activation-mediated Ras adaptation and lowers the sensitivity of human neutrophils so

34 that they are able to chemotax through a higher concentration range of chemoattractant gradients.

## 35 **Significance Statement**

36 Neutrophils provide first-line host defense by migrating through chemoattractant gradients to the  
37 sites of inflammation. Inappropriate recruitment and mis-regulated activation of neutrophils  
38 contribute to tissue damage and cause autoimmune and inflammatory disease. One fascinating  
39 feature of chemotactic neutrophils is their ability to migrate through an enormous concentration  
40 range of chemoattractant gradients ( $10^{-9} \sim 10^{-5}$  M) through “adaptation,” in which cells no longer  
41 respond to the present stimuli, but remain sensitive to stronger stimuli. The inhibitory  
42 mechanism largely remains elusive, although many molecules of the excitatory signaling  
43 pathway have been identified. Our study reveals, for the first time, that the inhibitory component,  
44 CAPRI, is essential for both the sensitivity and the GPCR-mediated adaptation of human  
45 neutrophils.

46 **/body**

## 47 **Introduction**

48 Neutrophils provide first-line host defense and play pivotal roles in innate and adaptive  
49 immunity (1-3). Inappropriate recruitment and dysregulated activation of neutrophils contribute  
50 to tissue damage and cause autoimmune and inflammatory diseases (1, 4). Neutrophils sense  
51 chemoattractants and migrate to sites of inflammation using G protein-coupled receptors  
52 (GPCRs). To accurately navigate through an enormous concentration-range gradient of various  
53 chemoattractants ( $10^{-9} \sim 10^{-5}$  M) (Fig. S1), neutrophils employ a mechanism called adaptation, in  
54 which they no longer respond to present stimuli but remain sensitive to stronger stimuli.  
55 Homogeneous, sustained chemoattractant stimuli trigger transient, adaptive responses in many  
56 steps of the GPCR-mediated signaling pathway downstream of heterotrimeric G proteins (5, 6).  
57 Adaptation provides a fundamental strategy for eukaryotic cell chemotaxis through large  
58 concentration-range gradients of chemoattractants. Abstract models and computational  
59 simulations have proposed mechanisms generating the temporal dynamics of adaptation: an  
60 increase in receptor occupancy activates two antagonistic signaling processes, namely, a rapid  
61 “excitation” that triggers cellular responses and a temporally delayed “inhibition” that terminates  
62 the responses and results in adaptation (5, 7-13). Many excitatory components have been  
63 identified during last two decades; however, the inhibitor(s) have just begun to be revealed (11,  
64 14-17). It has been recently shown that an elevated Ras activity increases the sensitivity and  
65 changes migration behavior (18, 19). However, the molecular connection between the GPCR-  
66 mediated adaptation and the cell sensitivity remains missing.

67 The small GTPase Ras mediates multiple signaling pathways that control directional cell  
68 migration in both neutrophils and *Dictyostelium discoideum* (17, 20-24). In *D. discoideum*, Ras

69 is the first signal event that displays GPCR-mediated adaptation (20). Ras signaling is mainly  
70 regulated through its activator, guanine nucleotide exchange factor (GEF), and its inactivator,  
71 GTPase-activating proteins (GAP) (16, 17, 25). In *D. discoideum*, the roles of DdNF1 and an F-  
72 actin-dependent negative feedback mechanism have been previously reported (14, 17). We have  
73 previously demonstrated the involvement of locally recruited inhibitors that act on upstream of  
74 PI<sub>3</sub>K in sensing of chemoattractant gradients (11, 26). Recently, we identified a locally recruited  
75 RasGAP protein, C2GAP1, that is essential for F-actin-independent Ras adaptation and long-  
76 range chemotaxis in *Dictyostelium* (16). Active Ras proteins enrich at the leading edge in both *D.*  
77 *discoideum* cells and neutrophils (17, 27, 28). It has been reported that a RasGEF, RasGRP4,  
78 plays a critical role in Ras activation in murine neutrophil chemotaxis (21, 29). However, the  
79 components involved in the GPCR-mediated deactivation of Ras and their function in neutrophil  
80 chemotaxis are still not known.

81 In the present study, we show that CAPRI (a Calcium-promoted Ras inactivator) locally controls  
82 the GPCR-mediated Ras adaptation in human neutrophils. In response to high-concentration  
83 stimuli, cells lacking CAPRI (*capri*<sup>kd</sup>) exhibit non-adaptive Ras activation; significantly  
84 increased activation of AKT, GSK3 $\alpha$ /3 $\beta$ , and cofilin; excessive actin polymerization; and  
85 subsequent defective chemotaxis. Unexpectedly, *capri*<sup>kd</sup> cells display enhanced sensitivity  
86 toward chemoattractants and an improved chemotaxis in low- or subsensitive-concentration  
87 gradients. Taken together, our findings show that CAPRI Functions as an inhibitory component  
88 of Ras signaling, plays a critical role in controlling the concentration range of chemoattractant  
89 sensing, and is important for the proper adaptation during chemotaxis.

90

## 91 **Results**

92 **CAPRI regulates GPCR-mediated Ras adaptation in human neutrophils.** Chemoattractants  
93 induce robust, transient Ras activation in mammalian neutrophils (21, 30). To identify which  
94 RasGAP proteins that deactivate Ras in neutrophils, we examined the expression of potential  
95 RasGAPs in mouse and human neutrophils (Fig. S2A) (31, 32). We found that human and mouse  
96 neutrophils highly expressed CAPRI, also called RASA4, consistent with previous reports (33-  
97 35). The human neutrophil-like (HL60) cell line provides a useful model to study mammalian  
98 neutrophils (22, 36). The differentiated HL60 cell also highly expresses CAPRI (Fig. S2B),  
99 consistent with a previous report (37), and provides a suitable cell system in which to study  
100 CAPRI's function in human neutrophils. We found that chemoattractant fMLP (N-formyl-L-  
101 methionyl-L-leucyl-phenylalanine) stimulation promoted the association between CAPRI and N-  
102 Ras/Rap1 (Fig 1A), suggesting a role of CAPRI in the regulation of chemoattractant-induced Ras  
103 and Rap1 signaling. To determine the function of CAPRI, we stably knocked down the  
104 expression of *capri* (*capri<sup>kd</sup>*) in HL60 cells using *capri*-specific shRNA lentiviral particles (Fig.  
105 1B). We first biochemically determined the dynamics of fMLP-induced Ras activation in both  
106 CTL and *capri<sup>kd</sup>* cells using a pull-down assay with a large population of cells (Fig. 1C). In  
107 resting *capri<sup>kd</sup>* cells, there was a notably higher level of active Ras, indicating CAPRI's function  
108 in regulating basal Ras activity in the cells. In response to 1  $\mu$ M fMLP stimulation, we detected a  
109 transient Ras activation followed by a secondary reactivation in CTL cells as previously reported  
110 (14, 16, 30), but a significantly stronger, prolonged Ras activation in *capri<sup>kd</sup>* cells (Fig. 1D). We  
111 further monitored fMLP-induced Ras activation by visualizing the membrane translocation of a  
112 fluorescent active Ras probe, the active Ras binding domain of human Raf1 tagged with RFP  
113 (RBD-RFP, red), in single live cells using fluorescence microscopy (Fig. 1E). In the present  
114 study, we used three plasma membrane (PM) markers, Mem-cerulean, C1AC1A-YFP, and

115 CAAX-mCherry, to track the cell membrane in live cell experiment (Fig. S3). We monitored Ras  
116 activation in CTL and *capri*<sup>kd</sup> cells expressing both PM marker (green) and active Ras probe  
117 RBD-RFP (red) in response to uniformly applied 1  $\mu$ M fMLP stimulation. We found that RBD-  
118 RFP translocated to and colocalized with PM marker (green) and then returned to the cytoplasm,  
119 followed by a second translocation to the protrusion sites of CTL cells (Fig. 1E, upper panel, and  
120 see Video S1 for a complete, longer time period). In *capri*<sup>kd</sup> cells, the same fMLP stimulation  
121 induced persistent membrane translocation and accumulation on the continuously expanding and  
122 broadened leading front of the cell (Fig. 1E, middle panel, and Video S2). To further examine  
123 CAPRI's function in Ras deactivation, we expressed CAPRI-tagged turboGFP (CAPRI-tGFP),  
124 RBD-RFP, and PM marker (Mem-cerulean) in *capri*<sup>kd</sup> cells (*capri*<sup>kd/OE</sup>) and monitored fMLP-  
125 induced Ras activation in these cells. 1  $\mu$ M fMLP stimulation triggered a clear membrane  
126 translocation of CAPRI-tGFP but much weaker or no membrane translocation of RBD-RFP in  
127 *capri*<sup>kd/OE</sup> cells (Fig. 1E, lower panel, Fig. S4, and Video S3), suggesting that CAPRI  
128 translocates to the plasma membrane to inhibit Ras activation (33). Quantitative measurement of  
129 RBD-RFP membrane translocation confirmed that fMLP stimulation induced a biphasic Ras  
130 activation in CTL cells as previously reported (30), a prolonged Ras activation in *capri*<sup>kd</sup> cells,  
131 and a reduced Ras activation in *capri*<sup>kd/OE</sup> cells (Fig. 1F). Taken together, our results indicate  
132 that CAPRI is a RasGAP protein and is required for chemoattractant-mediated Ras adaptation in  
133 neutrophils.

134

135 **Membrane targeting of CAPRI in response to chemoattractant stimulation.** To reveal how  
136 CAPRI functions during neutrophil chemotaxis, we examined cellular localization of CAPRI-  
137 tGFP in HL60 cells. We found that CAPRI-tGFP colocalized with active Ras (RBD-RFP) and

138 actin at the leading edge of chemotaxing HL60 cells in a fMLP gradient (Fig. 2A), consistent  
139 with previous reports (16, 22, 35). Chemoattractant fMLP and IL-8 induced membrane  
140 translocation of CAPRI-tGFP (Fig. 1E and Fig. S4-S5). The G protein inhibitor pertussis toxin  
141 (PT) blocked the membrane translocation of CAPRI (Fig. S6), indicating that chemoattractant  
142 GPCR/G protein-mediated signaling is required for CAPRI membrane targeting. To reveal the  
143 molecular mechanism of CAPRI membrane targeting, we investigated the domain requirement  
144 for its membrane translocation and interaction with Ras. We expressed tGFP-tagged WT and  
145 mutants of  $\Delta$ C2,  $\Delta$ PH, and a GAP-inactive mutant R472A, and determined their ability for Ras  
146 interaction (Fig. 2B-2C and Fig. S7). We found that  $\Delta$ C2 did not interact with Ras and R472A  
147 showed a decreased interaction with Ras (Fig. 2C), consistent with previous reports (33, 38-41).  
148 We next monitored the membrane translocation ability of CAPRI WT and its mutant in response  
149 to fMLP stimulation (Fig. 2D). Upon fMLP stimulation, WT and R472A clearly translocated to  
150 and colocalized with PM marker (Fig. 2D, top two panels and Video S4-S5), while  $\Delta$ PH and  
151  $\Delta$ C2 showed significantly decreased or little membrane translocation (Fig. 2D, lower two panels,  
152 and Video S6-S7). Using total internal reflections fluorescent (TIRF) microscopy, we confirmed  
153 the membrane-translocation behavior of CAPRI WT and its mutants (Fig. S8 and Fig. 2E) (42).  
154 Our results indicate that both the C2 and PH domains are crucial for chemoattractant-induced  
155 membrane targeting.

156

157 **Chemoattractant induces hyperactivation of Ras effectors in *capri*<sup>kd</sup> cells.** PI3K $\gamma$  is a direct  
158 effector of Ras, which synthesizes lipid phosphatidylinositol (3,4,5)-trisphosphate  
159 (PtdIns(3,4,5)P<sub>3</sub>, PIP<sub>3</sub>) and activates the PIP<sub>3</sub>-binding protein AKT in neutrophils (21, 29, 43).  
160 To examine the consequence of non-adaptive Ras activation, we monitored fMLP-induced PIP<sub>3</sub>



161 production using a biosensor PH-GFP (PH-domain of human AKT tagged with GFP, green) in  
162 both CTL and *capri<sup>kd</sup>* cells (Fig. 3A) (44). We found that 1  $\mu$ M fMLP triggered a robust  
163 translocation of PH-GFP to the entire plasma membrane followed by a partial return to the  
164 cytosol and a gradual accumulation in the protrusion site of CTL cell (Fig. 3A, upper panel, and  
165 Video S8). The same stimulation induced a stronger and persistent accumulation of PH-GFP all  
166 around the periphery of *capri<sup>kd</sup>* cells (Fig. 3A, lower panel, and Video S9), indicating a  
167 hyperactivation of PI3K in cells lacking CAPRI. We further determined the activation profile of  
168 PI3K $\gamma$  downstream effectors in CTL and *capri<sup>kd</sup>* cells. AKT and GSK are well-known effectors of  
169 Ras/PI3K $\gamma$  signaling and are critical for the reorganization of actin cytoskeleton in neutrophil  
170 chemotaxis (22, 45). Therefore, we examined fMLP-induced PI3K $\gamma$  activation by measuring the  
171 phosphorylation of AKT on residues T308 and T473 in both CTL and *capri<sup>kd</sup>* cells. We found  
172 that 1  $\mu$ M fMLP triggered a transient phosphorylation on T308 and T473 of AKT in CTL cells,  
173 while it induced a persistent and significantly increased phosphorylation on both residues of  
174 AKT in *capri<sup>kd</sup>* cells (Fig. 3B-3C), consistent with previous reports (46-48). Cofilin, an F-actin  
175 depolymerization factor (ADF), is essential for depolymerization of F-actin in dynamic  
176 reorganization of the actin cytoskeleton during cell migration (49). Its activity is regulated  
177 mainly through a phosphorylation event: phosphorylation on Ser-3 inhibits its actin binding,  
178 severing, and depolymerizing activities; and dephosphorylation on Ser-3 by slingshot proteins  
179 (SSHs) reactivates it. Slingshot 2 is a direct substrate of GSK3 and chemoattractants induce  
180 phosphorylation and inhibition of GSK3 $\alpha$ /3 $\beta$  partially through PI3K $\gamma$ -AKT pathways in  
181 neutrophils (45). As previously reported (45), GSK3 $\alpha$ /3 $\beta$  is constitutively active and  
182 dephosphorylated in resting cells, and fMLP induced a transient phosphorylation and

183 deactivation of GSK3 $\alpha$ /3 $\beta$  and led to a transient dephosphorylation of cofilin (Fig. 3D-3E). We  
184 found that 1  $\mu$ M fMLP stimulation triggered significantly stronger, prolonged phosphorylation of  
185 GSK3 $\alpha$ /3 $\beta$  and persistent dephosphorylation of cofilin in *capri*<sup>kd</sup> cells. Taken together, these  
186 results indicate that CAPRI is essential for the proper activation/deactivation dynamics of the  
187 PI3K $\gamma$ /AKT/GSK3/cofilin signaling pathway in response to chemoattractant stimulations.

188

189 **fMLP stimulation induces an increased activation of Rap1 and its effector in *capri*<sup>kd</sup> cells.**

190 Rap1 is a close relative of Ras initially described as a competitor of Ras by directly interacting  
191 with Ras effectors (50, 51). Later studies indicate that Rap1 also functions in independent  
192 signaling pathways to control diverse processes, such as cell adhesion, cell-cell junction  
193 formation, and cell polarity (52, 53). It has been shown that CAPRI also interacts with Rap1 in  
194 CHO cells (54). We found that fMLP stimulation promoted the interaction between CAPRI and  
195 Rap1 in neutrophils (Fig. 1A) and that CAPRI was recruited to adhesion sites and colocalized  
196 with the PM marker during cell migration (Fig. S9). To understand CAPRI's function in Rap1  
197 activation in human neutrophils, we determined fMLP-induced Rap1 activation in both CTL and  
198 *capri*<sup>kd</sup> cells by a pull-down assay using the Rap-GTP binding domain of human RalGDS  
199 (RBD<sub>RalGDS</sub>) (Fig. 4A). There was a higher level of active Rap1 in resting *capri*<sup>kd</sup> cells. fMLP  
200 stimulation (1  $\mu$ M) induced a transient Rap1 activation in CTL cells, while it triggered a  
201 significantly increased and prolonged Rap1 activation in *capri*<sup>kd</sup> cells (Fig. 4B). We further  
202 monitored Rap1 activation using an active Rap1 probe, GFP-tagged RBD<sub>RalGDS</sub> (RBD<sub>RalGDS</sub>-  
203 GFP) (52), using live cell fluorescence microscopy (Fig. 4C). We found that RBD<sub>RalGDS</sub>-GFP  
204 colocalized with PM marker at the adhesion/protrusion sites of the resting cells (Fig. 4C),

205 suggesting a potential function of Rap1 in the adhesion of neutrophils. Upon 1  $\mu$ M fMLP  
206 stimulation, RBD<sub>RalGDS</sub>-GFP (green) transiently translocated to and colocalized with PM marker  
207 (red), then returned to the cytoplasm, and then translocated to and colocalized with the PM  
208 marker again at the protruding sites of CTL cells (Fig. 4C, upper panel, and Video S10). In  
209 resting *capri*<sup>kd</sup> cells, there was notably more membrane localization of RBD<sub>RalGDS</sub>-GFP, which is  
210 consistent with the notion that there is a higher basal Rap1 activity in *capri*<sup>kd</sup> cells (Fig. 4C,  
211 lower panel). We further found that 1  $\mu$ M fMLP triggered prolonged translocation of RBD<sub>RalGDS</sub>-  
212 GFP (green) to and colocalization with the PM marker (red) during a continuous expansion of  
213 *capri*<sup>kd</sup> cells (Video S11), suggesting that the fMLP induces a hyperactivation of Rap1 in cells  
214 lacking CAPRI. To understand the effects of Rap1 hyperactivation, we examined Rap1 effector  
215 Erk42/44 phosphorylation (Fig. 4D). We detected higher basal Erk42/44 phosphorylation in the  
216 non-stimulated *capri*<sup>kd</sup> cells. In contrast to a rapid maximum phosphorylation of Erk 42/44 at 30  
217 s in CTL cells, same stimulation induced an increasing dynamics of Erk42/44 phosphorylation in  
218 *capri*<sup>kd</sup> cells (Fig. 4E), consistent with previous reports (33, 35, 54). Our results suggest that  
219 CAPRI deactivates Rap1 activation to facilitate an appropriate Rap1 activation and its effector  
220 for chemotaxis in neutrophils.

### 221 **Excessive polymerization of actin impairs the polarization and migration of *capri*<sup>kd</sup> cells.**

222 The chemoattractant GPCR/G-protein signaling regulates spatiotemporal activities of Ras and  
223 Rap1 that mediate multiple signaling pathways to control the dynamics of actin cytoskeleton that  
224 drives cell migration. To evaluate the role of CAPRI in chemoattractant GPCR-mediated actin  
225 assembly in neutrophils, we determined fMLP-mediated polymerization of actin in CTL and  
226 *capri*<sup>kd</sup> cells using a centrifugation assay of actin filaments (F-actin) (Fig. 5A). In CTL cells, 10

227  $\mu\text{M}$  fMLP stimulation induced a transient polymerization of actin. In *capri<sup>kd</sup>* cells, the same  
228 stimulation also triggered the initial, transient actin polymerization followed by a much stronger  
229 and persistent actin polymerization (Fig. 5A-5B). To understand the temporospatial dynamics of  
230 actin polymerization, we next monitored actin polymerization using the membrane translocation  
231 of an actin filament probe, F-tractin-GFP, in live cells by fluorescence microscopy (55). We  
232 found that, in response to uniformly applied 1  $\mu\text{M}$  fMLP, F-tractin-GFP (green) translocated to  
233 and colocalized with the PM marker (red) along the entire periphery of CTL cells, then  
234 withdrew, and accumulated at the protruding sites of CTL cells (Fig. 5C, upper panel and Video  
235 S12), indicating an initial overall actin polymerization on the entire periphery followed by a  
236 localized polymerization on the protrusion sites. In *capri<sup>kd</sup>* cells, the same stimulation triggered a  
237 stronger and prolonged membrane translocation of F-tractin-GFP, followed by a slight  
238 withdrawal, and then continuous accumulation on multiple expending/ruffling sites of cells (Fig.  
239 5C, lower panel and Video S13). To understand the effect of excessive actin polymerization on  
240 chemotaxis, we visualized the distribution of F-actin in cells migrating toward a 1  $\mu\text{M}$  fMLP  
241 gradient using another F-actin probe (SiR-actin, a live-cell staining probe) (Fig. 5D). As  
242 expected, CTL cells displayed a clearly polarized actin polymerization: a protruding leading  
243 front (pseudopod) and a contracting trailing edge (uropod), and they chemotaxed through the  
244 gradient and accumulated at the source of the fMLP gradient (Fig. 5D, left panel and Video S14).  
245 However, the *capri<sup>kd</sup>* cells, especially those close to the source of the 1  $\mu\text{M}$  fMLP gradient,  
246 displayed an overall excessive F-actin distribution, poor polarization, and significantly slow  
247 migration during chemotaxis (Fig. 5D, right panel and Video S15). Notably, some of the *capri<sup>kd</sup>*  
248 cells located relatively far away from the source of fMLP showed polarized morphology and  
249 migrated effectively toward the fMLP source, but gradually lost their polarity and stopped

250 moving when they were close to the source of the fMLP (Video S15). The above results together  
251 indicate that chemoattractant stimuli at high concentrations induce excessive polymerization of  
252 actin that impairs the polarization and migration of *capri<sup>kd</sup>* cells.

253 ***capri<sup>kd</sup>* cells display improved chemotaxis in low- or subsensitive-concentration gradients of**

254 **chemoattractants, but defective chemotaxis in high-concentration gradients.** To further

255 determine the function of CAPRI in chemotaxis of neutrophils, we monitored chemotaxis

256 behavior of CTL and *capri<sup>kd</sup>* cells in gradients of fMLP at different concentrations using an *EZ-*

257 *TAXIScan* analysis (56). In a 1  $\mu\text{M}$  fMLP gradient, *capri<sup>kd</sup>* cells, in a clear contrast to CTL cells,

258 displayed a significant decrease in migrating speed (CTL:  $20.86 \pm 3.12 \mu\text{m}/\text{min}$ ; *capri<sup>kd</sup>*:  $12.16$

259  $\pm 3.73 \mu\text{m}/\text{min}$ ), directionality (CTL:  $0.86 \pm 0.09$ ; *capri<sup>kd</sup>*:  $0.73 \pm 0.14 \mu\text{m}/\text{min}$ ), total path

260 length (CTL:  $140.56 \pm 27.7 \mu\text{m}$ ; *capri<sup>kd</sup>*:  $86.74 \pm 13.75 \mu\text{m}$ ), and polarity measured as

261 roundness of a cell (%) (CTL:  $76.2 \pm 6.81$ ; *capri<sup>kd</sup>*:  $84.82 \pm 5.76$ ) (Fig. 6A-6B). To understand

262 chemotaxis behavior over a large concentration range, we further monitored the chemotaxis

263 behavior of both CTL and *capri<sup>kd</sup>* cells in the fMLP gradients at lower concentrations (Fig. 6C).

264 We found that severe defects in chemotaxis in *capri<sup>kd</sup>* cells were clearly observed when they

265 experienced fMLP gradients at high concentration ( $>100 \text{ nM}$ ). When exposed to a gradient

266 generated from a lower concentration (10 nM fMLP source, both CTL and *capri<sup>kd</sup>* cells displayed

267 similar directionality, although *capri<sup>kd</sup>* cells still displayed decreased speed and total path length

268 (Fig. 6D). In response to a gradient generated from a 1 nM fMLP source, *capri<sup>kd</sup>* cells displayed

269 significantly better directionality, but similar migration speed, in comparison with CTL cells. In

270 a 0.1 nM fMLP gradient, most CTL cells displayed random migration, while the majority of

271 *capri<sup>kd</sup>* cells displayed improved directionality and migration speed. Without a gradient, *capri<sup>kd</sup>*

272 cells displayed a bigger random walk compared to CTL cells. That is, *capri*<sup>kd</sup> cells display  
273 defective chemotaxis in high-concentration gradients but improved chemotaxis in low- or  
274 subsensitive-concentration gradients of chemoattractants. We also observed this concentration-  
275 dependent change of chemotaxis capability of *capri*<sup>kd</sup> cells in response to gradients of IL-8,  
276 another chemoattractant for neutrophils (Fig. S10). The above result indicates that CTL cells  
277 chemotaxed efficiently through gradients of various chemoattractants ranging from 10<sup>-9</sup> to 10<sup>-6</sup>  
278 M, while *capri*<sup>kd</sup> cells did so from 10<sup>-10</sup> to 10<sup>-7</sup> M.

279 **An increased sensitivity of *capri*<sup>kd</sup> cells toward chemoattractants.** Using TIRF imaging, we  
280 noticed that CAPRI-tGFP localized on the membrane of resting cells, suggesting its potential  
281 role in inhibiting basal Ras activity (Fig. 7A). As expected, fMLP stimulation induced a strong,  
282 quick membrane translocation of CAPRI followed by a slow, gradual withdrawal with a notable  
283 fraction of CAPRI remaining on the plasma membrane for quite a long period of time. We also  
284 observed a higher basal Ras activity in *capri*<sup>kd</sup> cells (Fig. 1C), indicating a potential role of  
285 CAPRI in maintaining a low basal Ras activity in the resting cells. The basal activity of Ras is  
286 part of a positive feedback mechanism that promotes actin dynamics and, more importantly,  
287 chemotaxis in a shallow chemoattractant gradient in *D. discoideum* (24). We speculated that the  
288 higher basal Ras activity in *capri*<sup>kd</sup> cells might contribute to their enhanced random walk without  
289 a gradient or to their improved chemotaxis in a low- or subsensitive-concentration gradient (Fig.  
290 6). To determine whether *capri*<sup>kd</sup> cells have become more sensitive to the stimulus, we  
291 determined Ras and Rap1 activation in response to fMLP stimulation at different concentrations  
292 using a pull-down assay (Fig. 7B). Comparing to the CTL cells, we detected a stronger Ras/Rap1  
293 activation in *capri*<sup>kd</sup> cells in response to all three different concentrations (Fig. 7C). In response  
294 to 0.1 nM fMLP stimulation, CTL cells did not show a clear Ras or Rap1 activation but

295 displayed a weak oscillation, while *capri<sup>kd</sup>* cells showed a clear transient Ras activation. In  
296 response to 10 nM and 1  $\mu$ M fMLP stimulation, *capri<sup>kd</sup>* cells showed a stronger, longer  
297 activation of both Ras and Rap1 than CTL cells did.

298 We further determined the responsiveness of both CTL and *capri<sup>kd</sup>* cells to either 0.1 nM or 10  
299 nM fMLP stimulation by monitoring actin polymerization through the membrane translocation  
300 of F-tractin-GFP (Fig. 8). In response to 0.1 nM fMLP stimulation, most CTL cells (~ 90 %) did  
301 not show clear membrane translocation of F-tractin-GFP to the plasma membrane, while they  
302 showed a continuous translocation of F-tractin-GFP to the protrusion sites (Fig. 8A, top panel,  
303 and Video S16). In contrast, more than 80 % of the *capri<sup>kd</sup>* cells showed clear membrane  
304 translocation of F-tractin upon 0.1 nM fMLP stimulation (Video S17 and Fig. 8B), indicating a  
305 higher sensitivity of *capri<sup>kd</sup>* cells. Not surprisingly, 10 nM fMLP induced robust membrane  
306 translocation of F-tractin in both CTL and *capri<sup>kd</sup>* cells with different dynamics: CTL cells  
307 showed a clear transient translocation of F-tractin-GFP to plasma membrane (~ 5-40 s), followed  
308 by a withdrawal of most F-tractin from the plasma membrane (~ 50-60 s) and then a second  
309 translocation to the protrusion sites (> 60 s) (Video S18); while *capri<sup>kd</sup>* cells showed a stronger  
310 and longer membrane translocation of F-tractin-GFP to plasma membrane (~ 5-90 s) followed by  
311 a gradual withdrawal (~ 90-130 s) (Video S19), indicating a stronger response and a longer  
312 period of time required to adapt the stimulation. Consistent with the results above, a prolonged,  
313 non-adaptive actin polymerization was observed in *capri<sup>kd</sup>* cells in response to stimuli at higher  
314 concentrations (Fig. 5 and Fig. 8C). These results together demonstrate that *capri<sup>kd</sup>* cells, lacking  
315 Ras inhibitor, are sensitive to subsensitive-concentration chemoattractant stimuli for CTL cells,  
316 while they fail to chemotax through a high-concentration gradient as CTL cells do.

## 317 **Discussion**

318 Here, we show that CAPRI is a locally membrane-recruited negative regulator of Ras signaling  
319 and enables neutrophils to chemotax through a higher concentration range of chemoattractant  
320 gradients by lowering their sensitivity and through GPCR-mediated adaptation.

### 321 **Chemoattractant-induced deactivation of Ras is regulated through the local membrane**

322 **recruitment of CAPRI.** The membrane recruitment of CAPRI and its function in Ras  
323 deactivation have been previously studied (33, 39). CAPRI, CALcium-Promoted Ras Inactivator,  
324 was first characterized by its calcium-dependency on deactivation of Ras (33). In this study, we  
325 found that the  $\Delta C2$  mutant of CAPRI did not translocate in response to chemoattractant  
326 stimulation, indicating an essential role of C2/calcium binding in the membrane targeting of  
327 CAPRI (Fig. 2E). In addition to the C2 domain, we found that the  $\Delta PH$  mutant showed  
328 significantly decreased membrane translocation in response to chemoattractant stimulation (Fig.  
329 2D-2E). This result is consistent with the previous reports that the PH domain of the GAP1  
330 family is responsible for, or plays an important role, in their membrane translocation (34, 39, 57,  
331 58). We also found that deactivation of GAP activity of the GAP domain (R472A mutant) had no  
332 effect on CAPRI's membrane targeting (Fig. 2D), although it might affect its interaction with  
333 Ras (Fig. 2E), consistent with the notion that the arginine residue of the GAP domain not only is  
334 responsible for its GAP activity, but also stabilizes its interaction with Ras (41). We also found  
335 that *capri*<sup>kd/OE</sup> cells, which displayed little or no Ras activation, still exhibited a strong CAPRI  
336 membrane translocation, indicating that active status of Ras is not required for CAPRI membrane  
337 translocation. These results indicate that membrane translocation of CAPRI and its function as a  
338 GAP protein are sequential and yet independent.



339 **Inhibitor for the GPCR-mediated adaptation regulates the sensitivity of a eukaryotic cell.**

340 Motile *Escherichia coli* (*E. coli*) provides the simplest and the best understood model of  
341 chemosensing system that is also mediated by chemoreceptors (59, 60). Modification of the  
342 chemoreceptors and interactions among the chemoreceptors have been proposed for a robust  
343 response, a precise adaptation, and a high sensitivity of chemoreceptors in bacteria (61-63).  
344 However, the molecular mechanism by which to control the GPCR-mediated adaptation and the  
345 sensitivity of a eukaryotic cell in chemotaxis are not fully understood. A local excitation and  
346 global inhibition (LEGI) model explained how a eukaryotic cell responds to chemoattractant  
347 stimuli with a wide-concentration range, achieves adaptation, and establishes the intracellular  
348 polarization (10, 64). Different from *E. coli*, chemoattractant stimulation induces a persistent  
349 activation of heterotrimeric G protein in *Dictyostelium* (6, 11, 26), indicating that adaptation  
350 occurs downstream of GPCR/G protein in the eukaryotic cell. We constructed a detailed model  
351 to explain adaptation and chemosensing of *Dictyostelium* cells (15, 65), which led us to uncover  
352 the essential role of Ras inhibitors in the GPCR-mediated adaptation (11, 16). Recently, it has  
353 been shown that reducing the PI(3,4)P<sub>2</sub> level on the plasma membrane increases Ras activity and  
354 enhances the excitability in *D. discoideum* (18, 19) and that active Ras plays a role in basal  
355 locomotion and in chemotaxing through very shallow gradients (24). We also detected a higher  
356 basal activity of Ras and Rap1 in *capri*<sup>kd</sup> cells. These reports inspired us to test the chemotaxis  
357 capability of both CTL and *capri*<sup>kd</sup> cells using wide concentration-range gradients of various  
358 chemoattractants (Fig. 6 and Fig. S10). In response to fMLP gradients, CTL cells chemotaxed  
359 better than *capri*<sup>kd</sup> cells did in gradients at high concentrations (> 100 nM), while they displayed  
360 similar chemotaxis capability to *capri*<sup>kd</sup> cells in mild gradients (10 nM of fMLP). In weak  
361 gradients (< 1 nM), *capri*<sup>kd</sup> cells chemotaxed better than CTL cells did. Similar chemotaxis

362 behavior was also observed when CTL and *capri*<sup>kd</sup> cells were exposing to gradients of IL-8.  
363 Interestingly, *capri*<sup>kd</sup> cells sensed and responded to weak gradients of fMLP and IL-8 at the  
364 concentration that are subsensitive to CTL cells due to a higher sensitivity of *capri*<sup>kd</sup> cells (Fig. 7  
365 and Fig. 8). Thus, our study provides evidence that human neutrophils locally recruits Ras  
366 inhibitor, CAPRI, to regulate Ras adaptation and their sensitivity. CAPRI enables human  
367 neutrophils to chemotax through a higher-concentration range of chemoattractant gradients by  
368 lowering its sensitivity and by mediating the GPCR-mediated adaptation.

369 **Multiple RasGAP proteins might be involved in Ras deactivation in chemoattractant-**  
370 **induced adaptation of neutrophils.** In the present study, we have shown that CAPRI mediates  
371 chemoattractant-induced Ras adaptation and sensitivity of neutrophils. Human neutrophils  
372 without CAPRI fail in chemoattractant-induced adaptive Ras activation; have significantly  
373 increased phosphorylation of AKT, GSK3 $\alpha$ /3 $\beta$ , and cofilin; demonstrate excessive actin  
374 polymerization; and exhibit a subsequent defect in chemotaxis in response to high-concentration  
375 gradients. However, in response to a low-concentration (either 0.1 nM or 10 nM fMLP)  
376 stimulation, *capri*<sup>kd</sup> cells displayed transient Ras/ Rap1 activation and actin polymerization,  
377 although they displayed prolonged, non-adaptive responses upon stimulation with higher  
378 concentrations (Fig. 1, Fig. 7, and Fig. 8). HL60 cells also expressed RASAL1 and RASAL2  
379 (Fig. S2)(37), which also deactivate Ras (34, 39). In mouse and human neutrophils, there are  
380 other RasGAP proteins expressed in addition to CAPRI (Fig. S2). p120 GAP is present in both  
381 human and mouse neutrophils but absent in HL60 cells (66) and its role has been implicated in  
382 cell migration (67, 68). While we revealed a major role of CAPRI in mediating the GPCR-

383 mediated Ras adaptation in HL60 cells, it is also crucial to determine potentially roles of other  
384 RasGAP proteins in Ras adaptation and chemotaxis in primary mammalian neutrophils.

### 385 **Acknowledgements**

386 We thank Drs. Arjan Kortholt, Xinzhuan Su, and Peter Crompton for their critical reading of the  
387 article. This work was supported by the NIH Intramural Fund from the National Institute of  
388 Allergy and Infectious Diseases, National Institutes of Health.

### 389 **Materials and Methods**

390 Detailed descriptions of cells, cell lines, cell culture, and differentiation, reagents and antibodies,  
391 plasmids and transfection of cells, immunoblotting of fMLP-mediated signaling components,  
392 Ras and Rap1 activation assay, actin polymerization assay, immunoprecipitation assay, imaging  
393 and data processing, TAXIScan chemotaxis assay and data analysis, and SiR-actin staining are in  
394 Supplementary information.

### 395 **References**

- 396 1. S. Nourshargh, R. Alon, Leukocyte migration into inflamed tissues. *Immunity* **41**, 694-707 (2014).
- 397 2. C. Tecchio, A. Micheletti, M. A. Cassatella, Neutrophil-derived cytokines: facts beyond  
398 expression. *Frontiers in immunology* **5**, 508 (2014).
- 399 3. A. Mantovani, M. A. Cassatella, C. Costantini, S. Jaillon, Neutrophils in the activation and  
400 regulation of innate and adaptive immunity. *Nat Rev Immunol* **11**, 519-531 (2011).
- 401 4. E. Kolaczkowska, P. Kubes, Neutrophil recruitment and function in health and inflammation. *Nat*  
402 *Rev Immunol* **13**, 159-175 (2013).
- 403 5. O. Hoeller, D. Gong, O. D. Weiner, How to understand and outwit adaptation. *Dev Cell* **28**, 607-  
404 616 (2014).
- 405 6. C. Janetopoulos, T. Jin, P. Devreotes, Receptor-mediated activation of heterotrimeric G-proteins  
406 in living cells. *Science* **291**, 2408-2411 (2001).
- 407 7. P. Devreotes, C. Janetopoulos, Eukaryotic chemotaxis: distinctions between directional sensing  
408 and polarization. *The Journal of biological chemistry* **278**, 20445-20448 (2003).
- 409 8. A. R. Houk *et al.*, Membrane tension maintains cell polarity by confining signals to the leading  
410 edge during neutrophil migration. *Cell* **148**, 175-188 (2012).

- 411 9. A. Nakajima, S. Ishihara, D. Imoto, S. Sawai, Rectified directional sensing in long-range cell  
412 migration. *Nat Commun* **5**, 5367 (2014).
- 413 10. C. A. Parent, P. N. Devreotes, A cell's sense of direction. *Science* **284**, 765-770 (1999).
- 414 11. X. Xu, M. Meier-Schellersheim, J. Yan, T. Jin, Locally controlled inhibitory mechanisms are  
415 involved in eukaryotic GPCR-mediated chemosensing. *The Journal of cell biology* **178**, 141-153  
416 (2007).
- 417 12. K. Takeda *et al.*, Incoherent feedforward control governs adaptation of activated ras in a  
418 eukaryotic chemotaxis pathway. *Sci Signal* **5**, ra2 (2012).
- 419 13. W. Ma, A. Trusina, H. El-Samad, W. A. Lim, C. Tang, Defining network topologies that can achieve  
420 biochemical adaptation. *Cell* **138**, 760-773 (2009).
- 421 14. P. G. Charest *et al.*, A Ras signaling complex controls the RasC-TORC2 pathway and directed cell  
422 migration. *Dev Cell* **18**, 737-749 (2010).
- 423 15. X. Xu *et al.*, Coupling mechanism of a GPCR and a heterotrimeric G protein during  
424 chemoattractant gradient sensing in Dictyostelium. *Sci Signal* **3**, ra71 (2010).
- 425 16. X. Xu *et al.*, GPCR-controlled membrane recruitment of negative regulator C2GAP1 locally  
426 inhibits Ras signaling for adaptation and long-range chemotaxis. *Proc Natl Acad Sci U S A* **114**,  
427 E10092-E10101 (2017).
- 428 17. S. Zhang, P. G. Charest, R. A. Firtel, Spatiotemporal regulation of Ras activity provides directional  
429 sensing. *Current biology : CB* **18**, 1587-1593 (2008).
- 430 18. X. Li *et al.*, Mutually inhibitory Ras-PI(3,4)P2 feedback loops mediate cell migration. *Proc Natl*  
431 *Acad Sci U S A* **115**, E9125-E9134 (2018).
- 432 19. Y. Miao *et al.*, Altering the threshold of an excitable signal transduction network changes cell  
433 migratory modes. *Nat Cell Biol* **19**, 329-340 (2017).
- 434 20. A. T. Sasaki, C. Chun, K. Takeda, R. A. Firtel, Localized Ras signaling at the leading edge regulates  
435 PI3K, cell polarity, and directional cell movement. *The Journal of cell biology* **167**, 505-518  
436 (2004).
- 437 21. S. Suire *et al.*, GPCR activation of Ras and PI3Kc in neutrophils depends on PLCb2/b3 and the  
438 RasGEF RasGRP4. *The EMBO journal* **31**, 3118-3129 (2012).
- 439 22. M. J. Wang, Y. Artemenko, W. J. Cai, P. A. Iglesias, P. N. Devreotes, The directional response of  
440 chemotactic cells depends on a balance between cytoskeletal architecture and the external  
441 gradient. *Cell Rep* **9**, 1110-1121 (2014).
- 442 23. L. Zheng, J. Eckerdal, I. Dimitrijevic, T. Andersson, Chemotactic peptide-induced activation of Ras  
443 in human neutrophils is associated with inhibition of p120-GAP activity. *The Journal of biological*  
444 *chemistry* **272**, 23448-23454 (1997).
- 445 24. P. J. van Haastert, I. Keizer-Gunnink, A. Kortholt, Coupled excitable Ras and F-actin activation  
446 mediates spontaneous pseudopod formation and directed cell movement. *Molecular biology of*  
447 *the cell* **28**, 922-934 (2017).
- 448 25. R. H. Insall, J. Borleis, P. N. Devreotes, The aimless RasGEF is required for processing of  
449 chemotactic signals through G-protein-coupled receptors in Dictyostelium. *Current biology : CB*  
450 **6**, 719-729 (1996).
- 451 26. X. Xu, M. Meier-Schellersheim, X. Jiao, L. E. Nelson, T. Jin, Quantitative imaging of single live cells  
452 reveals spatiotemporal dynamics of multistep signaling events of chemoattractant gradient  
453 sensing in Dictyostelium. *Molecular biology of the cell* **16**, 676-688 (2005).
- 454 27. X. Xu *et al.*, Quantitative Monitoring Spatiotemporal Activation of Ras and PKD1 Using Confocal  
455 Fluorescent Microscopy. *Methods Mol Biol* **1407**, 307-323 (2016).
- 456 28. H. Kae, C. J. Lim, G. B. Spiegelman, G. Weeks, Chemoattractant-induced Ras activation during  
457 Dictyostelium aggregation. *EMBO Rep* **5**, 602-606 (2004).

- 458 29. S. Suire *et al.*, Gbetagammas and the Ras binding domain of p110gamma are both important  
459 regulators of PI(3)Kgamma signalling in neutrophils. *Nat Cell Biol* **8**, 1303-1309 (2006).
- 460 30. C. Knall *et al.*, Interleukin-8 regulation of the Ras/Raf/mitogen-activated protein kinase pathway  
461 in human neutrophils. *The Journal of biological chemistry* **271**, 2832-2838 (1996).
- 462 31. S. Yarwood, D. Bouyoucef-Cherchalli, P. J. Cullen, S. Kupzig, The GAP1 family of GTPase-  
463 activating proteins: spatial and temporal regulators of small GTPase signalling. *Biochemical*  
464 *Society transactions* **34**, 846-850 (2006).
- 465 32. T. Grewal, M. Koese, F. Tebar, C. Enrich, Differential Regulation of RasGAPs in Cancer. *Genes*  
466 *Cancer* **2**, 288-297 (2011).
- 467 33. P. J. Lockyer, S. Kupzig, P. J. Cullen, CAPRI regulates Ca(2+)-dependent inactivation of the Ras-  
468 MAPK pathway. *Current biology : CB* **11**, 981-986 (2001).
- 469 34. P. J. Lockyer *et al.*, Identification of the ras GTPase-activating protein GAP1(m) as a  
470 phosphatidylinositol-3,4,5-trisphosphate-binding protein in vivo. *Current biology : CB* **9**, 265-268  
471 (1999).
- 472 35. J. Zhang, J. Guo, I. Dzhagalov, Y. W. He, An essential function for the calcium-promoted Ras  
473 inactivator in Fcgamma receptor-mediated phagocytosis. *Nature immunology* **6**, 911-919 (2005).
- 474 36. X. Xu *et al.*, GPCR-Mediated PLCbetagamma/PKCbeta/PKD Signaling Pathway Regulates the  
475 Cofilin Phosphatase Slingshot 2 in Neutrophil Chemotaxis. *Molecular biology of the cell*  
476 10.1091/mbc.E14-05-0982 (2015).
- 477 37. E. Rincon, B. L. Rocha-Gregg, S. R. Collins, A map of gene expression in neutrophil-like cell lines.  
478 *BMC Genomics* **19**, 573 (2018).
- 479 38. M. Upadhyaya *et al.*, Mutational and functional analysis of the neurofibromatosis type 1 (NF1)  
480 gene. *Hum Genet* **99**, 88-92 (1997).
- 481 39. Q. Liu *et al.*, CAPRI and RASAL impose different modes of information processing on Ras due to  
482 contrasting temporal filtering of Ca2+. *The Journal of cell biology* **170**, 183-190 (2005).
- 483 40. I. R. Vetter, A. Wittinghofer, The guanine nucleotide-binding switch in three dimensions. *Science*  
484 **294**, 1299-1304 (2001).
- 485 41. K. Scheffzek, A. Lautwein, W. Kabsch, M. R. Ahmadian, A. Wittinghofer, Crystal structure of the  
486 GTPase-activating domain of human p120GAP and implications for the interaction with Ras.  
487 *Nature* **384**, 591-596 (1996).
- 488 42. X. Xu, P. Johnson, S. C. Mueller, Breast cancer cell movement: imaging invadopodia by TIRF and  
489 IRM microscopy. *Methods Mol Biol* **571**, 209-225 (2009).
- 490 43. Z. Li *et al.*, Roles of PLC-beta2 and -beta3 and PI3Kgamma in chemoattractant-mediated signal  
491 transduction. *Science* **287**, 1046-1049 (2000).
- 492 44. G. Servant *et al.*, Polarization of chemoattractant receptor signaling during neutrophil  
493 chemotaxis. *Science* **287**, 1037-1040 (2000).
- 494 45. W. Tang *et al.*, A PLCbeta/PI3Kgamma-GSK3 signaling pathway regulates cofilin phosphatase  
495 slingshot2 and neutrophil polarization and chemotaxis. *Dev Cell* **21**, 1038-1050 (2011).
- 496 46. H. Cai *et al.*, Ras-mediated activation of the TORC2-PKB pathway is critical for chemotaxis. *The*  
497 *Journal of cell biology* **190**, 233-245 (2010).
- 498 47. D. D. Sarbassov, D. A. Guertin, S. M. Ali, D. M. Sabatini, Phosphorylation and regulation of  
499 Akt/PKB by the rictor-mTOR complex. *Science* **307**, 1098-1101 (2005).
- 500 48. D. R. Alessi *et al.*, Mechanism of activation of protein kinase B by insulin and IGF-1. *The EMBO*  
501 *journal* **15**, 6541-6551 (1996).
- 502 49. K. Mizuno, Signaling mechanisms and functional roles of cofilin phosphorylation and  
503 dephosphorylation. *Cell Signal* **25**, 457-469 (2013).

- 504 50. H. Kitayama, Y. Sugimoto, T. Matsuzaki, Y. Ikawa, M. Noda, A ras-related gene with  
505 transformation suppressor activity. *Cell* **56**, 77-84 (1989).
- 506 51. J. L. Bos, All in the family? New insights and questions regarding interconnectivity of Ras, Rap1  
507 and Ral. *The EMBO journal* **17**, 6776-6782 (1998).
- 508 52. T. G. Bivona *et al.*, Rap1 up-regulation and activation on plasma membrane regulates T cell  
509 adhesion. *The Journal of cell biology* **164**, 461-470 (2004).
- 510 53. T. J. Jeon, D. J. Lee, S. Merlot, G. Weeks, R. A. Firtel, Rap1 controls cell adhesion and cell motility  
511 through the regulation of myosin II. *The Journal of cell biology* **176**, 1021-1033 (2007).
- 512 54. Y. Dai *et al.*, Ca<sup>2+</sup>-dependent monomer and dimer formation switches CAPRI Protein between  
513 Ras GTPase-activating protein (GAP) and RapGAP activities. *The Journal of biological chemistry*  
514 **286**, 19905-19916 (2011).
- 515 55. J. Yi, X. S. Wu, T. Crites, J. A. Hammer, 3rd, Actin retrograde flow and actomyosin II arc  
516 contraction drive receptor cluster dynamics at the immunological synapse in Jurkat T cells.  
517 *Molecular biology of the cell* **23**, 834-852 (2012).
- 518 56. X. Wen, T. Jin, X. Xu, Imaging G Protein-coupled Receptor-mediated Chemotaxis and its Signaling  
519 Events in Neutrophil-like HL60 Cells. *J Vis Exp* 10.3791/54511 (2016).
- 520 57. P. J. Lockyer *et al.*, Distinct subcellular localisations of the putative inositol 1,3,4,5-  
521 tetrakisphosphate receptors GAP1IP4BP and GAP1m result from the GAP1IP4BP PH domain  
522 directing plasma membrane targeting. *Current biology : CB* **7**, 1007-1010 (1997).
- 523 58. G. E. Cozier *et al.*, GAP1IP4BP contains a novel group I pleckstrin homology domain that directs  
524 constitutive plasma membrane association. *The Journal of biological chemistry* **275**, 28261-  
525 28268 (2000).
- 526 59. J. S. Parkinson, G. L. Hazelbauer, J. J. Falke, Signaling and sensory adaptation in Escherichia coli  
527 chemoreceptors: 2015 update. *Trends Microbiol* **23**, 257-266 (2015).
- 528 60. S. L. Porter, G. H. Wadhams, J. P. Armitage, Signal processing in complex chemotaxis pathways.  
529 *Nat Rev Microbiol* **9**, 153-165 (2011).
- 530 61. C. H. Hansen, R. G. Endres, N. S. Wingreen, Chemotaxis in Escherichia coli: a molecular model for  
531 robust precise adaptation. *PLoS Comput Biol* **4**, e1 (2008).
- 532 62. B. A. Mello, Y. Tu, Effects of adaptation in maintaining high sensitivity over a wide range of  
533 backgrounds for Escherichia coli chemotaxis. *Biophys J* **92**, 2329-2337 (2007).
- 534 63. D. Clausnitzer, O. Oleksiuk, L. Lovdok, V. Sourjik, R. G. Endres, Chemotactic response and  
535 adaptation dynamics in Escherichia coli. *PLoS Comput Biol* **6**, e1000784 (2010).
- 536 64. Y. Xiong, C. H. Huang, P. A. Iglesias, P. N. Devreotes, Cells navigate with a local-excitation, global-  
537 inhibition-biased excitable network. *Proc Natl Acad Sci U S A* **107**, 17079-17086 (2010).
- 538 65. M. Meier-Schellersheim *et al.*, Key role of local regulation in chemosensing revealed by a new  
539 molecular interaction-based modeling method. *PLoS Comput Biol* **2**, e82 (2006).
- 540 66. T. Skorski *et al.*, p120 GAP requirement in normal and malignant human hematopoiesis. *J Exp*  
541 *Med* **178**, 1923-1933 (1993).
- 542 67. T. Grewal, C. Enrich, Molecular mechanisms involved in Ras inactivation: the annexin A6-  
543 p120GAP complex. *Bioessays* **28**, 1211-1220 (2006).
- 544 68. T. Grewal *et al.*, Annexin A6-A multifunctional scaffold in cell motility. *Cell Adh Migr* **11**, 288-304  
545 (2017).

546

## 547 **Figure legends**



548 **Fig. 1.** CAPRI interacts with Ras and regulates chemoattractant GPCR-induced Ras adaptation.  
549 (A) fMLP-stimulated association between Ras/Rap1/Rac1 and CAPRI detected by co-  
550 immunoprecipitation assay. (B) Expression of *capri* in HL60 cells transfected with non-specific  
551 (CTL) or *capri* specific (*capri<sup>kd</sup>*) shRNA virus particles. CAPRI was detected by antibodies  
552 against human CAPRI. Actin was detected as a loading control; fMLP receptor 1 FPR1 was also  
553 detected in both CTL and *capri<sup>kd</sup>* cells. (C) fMLP-induced Ras activation in CTL and *capri<sup>kd</sup>*  
554 cells determined by a pull-down assay. Upon stimulation with 10  $\mu$ M fMLP at time 0", cells  
555 were collected, lysed at the indicated time points, and then centrifuged at 10,000 *g* for 10 min at  
556 4 °C. Agarose beads pre-conjugated with RBD-GST (active Ras binding domain of Raf1 tagged  
557 with GST) were incubated with the supernatants of the lysates for 2 hours at 4 °C, then washed  
558 with lysis buffer. The protein bound to agarose beads was eluted with 2X SDS loading buffer  
559 (SLB). Aliquots of cells at the indicated time points were also mixed with the same volume of  
560 SLB for the detection of total Ras protein. The elutes of RBD-GST beads and the aliquots of the  
561 cells were analyzed by immunoblotting with anti-pan Ras antibody to detect either active Ras or  
562 total Ras protein. (D) Normalized quantitative densitometry of the active Ras from three  
563 independent experiments, including the result presented in C. The intensity ratio of active Ras  
564 and total Ras in WT at time 0 s was normalized to 1. Mean  $\pm$  SD from three independent  
565 experiments is shown. (E) Ras activation in CTL, *capri<sup>kd</sup>*, and *capri<sup>kd/OE</sup>* cells monitored by the  
566 membrane translocation of the mRFP-tagged active Ras binding domain of Raf1 (RBD-RFP) in  
567 response to 1  $\mu$ M fMLP stimulation. CTL (top panel and Video S1) and *capri<sup>kd</sup>* (middle panel  
568 and Video S2) cells expressed RBD-RFP (red) and a plasma membrane maker (PM, green). The  
569 *capri<sup>kd/OE</sup>* cell (bottom panel and Video S3) is a *capri<sup>kd</sup>* cell expressing a PM marker (cyan),  
570 CAPRI tagged with turboGFP (CAPRI-tGFP, green), and RBD-RFP (red). fMLP was applied to

571 the cells after 0 s. Scale bar, 10  $\mu\text{m}$ . (F) The quantitative measurement of Ras activation as the  
572 membrane translocation of RBD-RFP in E is shown. Mean  $\pm$  SD is shown; n = 3, 4, and 4 for  
573 CTL, *capri<sup>kd</sup>*, and *capri<sup>kd/OE</sup>* cells, respectively.

574 **Fig. 2.** Chemoattractant-induced membrane targeting of CAPRI. (A) Colocalization of active Ras  
575 and Rac1 with CAPRI in the leading edge of a chemotaxing cell. HL60 cells expressed a PM  
576 marker (cyan), both tGFP-tagged CAPRI (green), and RBD-RFP (red) or actin-mCherry (red)  
577 were exposed to a 100 nM fMLP gradient (dark blue). To visualize the fMLP gradient, 100 nM  
578 fMLP was mixed with Alexa 633 (dark blue). Scale bar = 10  $\mu\text{m}$ . (B) The scheme shows the  
579 domain composition of tGFP-tagged wild-type (WT) or mutants of CAPRI. (C) Domain  
580 requirement for the interaction of CAPRI and Ras determined by co-immunoprecipitation. HL60  
581 cells expressing either tGFP alone or tGFP-tagged WT or mutants of CAPRI were lysed with  
582 immunoprecipitation buffer with 1 mM GTP $\gamma$ S and went through the coimmunoprecipitation  
583 process and western blotting using anti-GFP or Ras antibodies. (D) Montage shows the  
584 membrane translocation of CAPRI and its mutants upon uniform application of 1  $\mu\text{M}$  fMLP.  
585 Cells expressing tGFP-tagged WT or mutants of CAPRI (green) and PM marker (red) were  
586 imaged in time-lapse and 100 nM fMLP (red) was applied to the cells after 0 s. Scale bar = 10  
587  $\mu\text{m}$ . Videos S4-S7 are CTL cells expressing PM marker (red) and tGFP-tagged WT, R472A,  
588  $\Delta\text{PH}$  or  $\Delta\text{C2}$  of CAPRI (green), respectively. (E) The quantitative measurement of the  
589 membrane translocation of CAPRI or its mutants is shown. Mean  $\pm$  SD is shown, n = 5, 4, 4, and  
590 4 for WT,  $\Delta\text{C2}$ ,  $\Delta\text{PH}$ , or R472A of CAPRI, respectively. The quantitative measurement of  
591 intensity changes was described in the Materials and Methods section.



592 **Fig. 3.** Enhanced chemoattractant-induced activation of PI<sub>3</sub>K signaling in *capri*<sup>kd</sup> cells. (A)  
593 Montage shows the membrane translocation of PIP<sub>3</sub> biosensor PH-GFP in CTL and *capri*<sup>kd</sup> cells  
594 in response to 1 μM fMLP stimulation. Cells expressing PH-GFP (GFP-tagged PH domain of  
595 human AKT, green) and PM marker (red) were stimulated with 1 μM fMLP at time 0 s. Scale  
596 bar = 10 μm. Videos S8 and S9 are CTL and *capri*<sup>kd</sup> cells, respectively. (B) fMLP-induced  
597 phosphorylation of AKT in CTL and *capri*<sup>kd</sup> cells. A final concentration of 10 μM fMLP  
598 stimulation was added to the cells at time 0 s. Aliquots of cells were sampled at the indicated  
599 time points and subjected to western blot detection of the phosphorylated and total proteins of  
600 interest in **A** and **C**. (C) Normalized quantitative densitometry of phosphorylated AKT by total  
601 AKT protein in **B**. Mean ± SD of three independent experiments is shown. The intensity ratio of  
602 the phosphorylated versus total AKT in CTL cells at time 0 s is normalized to 1. (D) fMLP-  
603 induced phosphorylation of GSK3α/3β and cofilin in CTL and *capri*<sup>kd</sup> cells. (E) Normalized  
604 quantitative densitometry of the phosphorylated GSK3α/3β, and cofilin in **D**. The intensity ratio  
605 of the phosphorylated versus total GSK3α/β and cofilin in CTL cells at time 0 s is normalized to  
606 1. Mean ± SD of three independent experiments is shown.

607 **Fig. 4.** Increased activation of Rap1 and its effector induced by fMLP stimulation in *capri*<sup>kd</sup>  
608 cells. (A) fMLP-induced Rap1 activation in CTL and *capri*<sup>kd</sup> cells determined by a pull-down  
609 assay using GST-RBD<sub>RalGDS</sub> agarose beads. (B) Normalized quantitative densitometry of the  
610 active Rap1 from three independent experiments, including the result presented in A. The  
611 intensity ratio of active Rap1 and total Rap1 in WT at time 0 s was normalized to 1. Mean ± SD  
612 from three independent experiments is shown. (C) fMLP-induced Rap1 activation monitored by  
613 the membrane translocation of the active Rap1 probe GFP-RBD<sub>RalGDS</sub>. Cells expressing

614 RBD<sub>RalGSD</sub>-GFP (green) and PM marker (red) were stimulated with 1  $\mu$ M fMLP at 0 s. Scale bar  
615 = 10  $\mu$ m. Videos S11-S12 are CTL and *capri<sup>kd</sup>* cells, respectively. (D) fMLP-induced  
616 phosphorylation of Erk42/44 in CTL and *capri<sup>kd</sup>* cells. (E) Normalized quantitative densitometry  
617 of the phosphorylated Erk42/44 in E. The intensity ratio of the phosphorylated versus total  
618 Erk42/44 in CTL cells at time 0 s is normalized to 1. Mean  $\pm$  SD of three independent  
619 experiments is shown.

620 **Fig. 5.** Elevated polymerization of actin in response to a high concentration of fMLP stimulation  
621 impairs the polarity and migration of *capri<sup>kd</sup>* cells. (A) The amount of globular (G) and  
622 filamentous (F) actin in CTL and *capri<sup>kd</sup>* cells was determined by a centrifugation assay of F-  
623 actin. Cells were stimulated with 10  $\mu$ M fMLP at time 0 s and aliquots of cells at the indicated  
624 time points were analyzed. (B) Normalized quantitative densitometry of the F/G-actin ratio in the  
625 CTL and of *capri<sup>kd</sup>* cells in (A). Mean  $\pm$  SD from three independent experiments is shown. The  
626 F/G ratio of CTL cells at 0 s was normalized to 1. (C) fMLP-induced actin polymerization by  
627 monitoring F-actin probe GFP-F-tractin using live cell confocal microscopy in CTL and *capri<sup>kd</sup>*  
628 cells. Cells expressing tractin-GFP (green) and PM marker (red) were stimulated with 1  $\mu$ M  
629 fMLP at time 0 s. Scale bar = 10  $\mu$ m. Videos S12-S13 are CTL and *capri<sup>kd</sup>* cells, respectively.  
630 (D) F-actin distribution in chemotaxing CTL and *capri<sup>kd</sup>* cells in a 1  $\mu$ M fMLP gradient. The  
631 differentiated cells were stained with the actin filament probe, SiR-actin (red). Cells were  
632 exposed to a 1  $\mu$ M fMLP gradient and allowed to chemotax for 5 min. Arrows point to the cells  
633 with a polarized, chemotaxing morphology. To visualize the gradient, fMLP was mixed with  
634 Alexa 488 (green, 1  $\mu$ g/ml). Scale bar = 20  $\mu$ m. Videos S14-S15 are CTL and *capri<sup>kd</sup>* cells,  
635 respectively. (E) The graph shows the roundness of CTL and *capri<sup>kd</sup>* cells shown in **D**. The

636 roundness was measured as the ratio of the width vs the length of the cell. That is, the roundness  
637 for a circle is 1 and for a line is 0. Student's *t*-test was used to calculate the *p* value.

638 **Fig. 6.** The concentration range of fMLP gradients in which neutrophils chemotax efficiently is  
639 upshifted in *capri*<sup>kd</sup> cells. (A) Montages showing the travel path of chemotaxing CTL or *capri*<sup>kd</sup>  
640 cells in a gradient generated from a 1 μM fMLP source. Cell movement was analyzed by DIAS  
641 software. (B) Chemotaxis behaviors measured from A are described as four parameters:  
642 directionality, which is “upward” directionality, where 0 represents random movement and 1  
643 represents straight movement toward the gradient; speed, defined as the distance that the centroid  
644 of the cell moves as a function of time; total path length, the total distance the cell has traveled;  
645 and roundness (%) for polarization, which is calculated as the ratio of the width to the length of  
646 the cell. Thus, a circle (no polarization) is 1 and a line (perfect polarization) is 0. Thirteen cells  
647 from each group were measured and the mean ± SD was shown. Student's *t*-test was used to  
648 calculate the *p* value. (C) Montages show the travel path of chemotaxing CTL or *capri*<sup>kd</sup> cells in  
649 response to a wide range of fMLP gradients. (D) Chemotaxis behaviors measured from C are  
650 described by three parameters: directionality, speed, and total path length as described in B.  
651 Thirteen cells from each group were measured. Student's *t*-test was used to calculate the *p* value.

652 **Fig. 7.** Activity of Ras and Rap1 is increased in *capri*<sup>kd</sup> cells. (A) CAPRI localizes at the plasma  
653 membrane before and after fMLP stimulation. (B) Ras and Rap1 activation in CTL and *capri*<sup>kd</sup>  
654 cells in response to 0.1 nM, 10 nM, or 1 μM fMLP stimulation determined by a pull-down assay.  
655 (C) Normalized quantitative densitometry of the active Ras and Rap1 from three independent  
656 experiments, including the result presented in B. The intensity ratio of active Ras and Rap1 in  
657 WT at time 0 s was normalized to 1. Mean ± SD from three independent experiments is shown.

658 **Fig. 8.** *capri<sup>kd</sup>* cells are more sensitive to the stimuli at low concentration and fail to adapt to the  
659 stimuli at high concentrations. (A) Montage shows cell response as actin polymerization  
660 monitored through the membrane translocation of F-actin probe, Ftractin-GFP, in both CTL or  
661 *capri<sup>kd</sup>* HL60 cells using fluorescent microscopy. Cells expressing GFP-F-tractin (green) and PM  
662 marker (red) were stimulated with either 0.1 nM or 10 nM fMLP stimulation. Scale bar = 10  $\mu$ m.  
663 Videos S16 and S18 are CTL cells and Videos S17 and S19 are *capri<sup>kd</sup>* cells. Videos S16-S17  
664 and Videos S18-19 were cells stimulated with either 0.1 nM or 10 nM fMLP, respectively. (B)  
665 The percentage of cells that respond to the indicated concentration of fMLP stimuli in CTL and  
666 *capri<sup>kd</sup>* cells is shown. (C) Percentage of cells with adaptation in response to fMLP stimulation.  
667 **B** and **C** were measured with the same sets of data. The numbers of independent experiments for  
668 CTL and *capri<sup>kd</sup>* cells for 0.1 nM, 10 nM, and 1  $\mu$ M fMLP stimuli are 11 and 7, 8 and 10, and 5  
669 and 9, respectively. Student's *t*-test was used to calculate the *p* value.

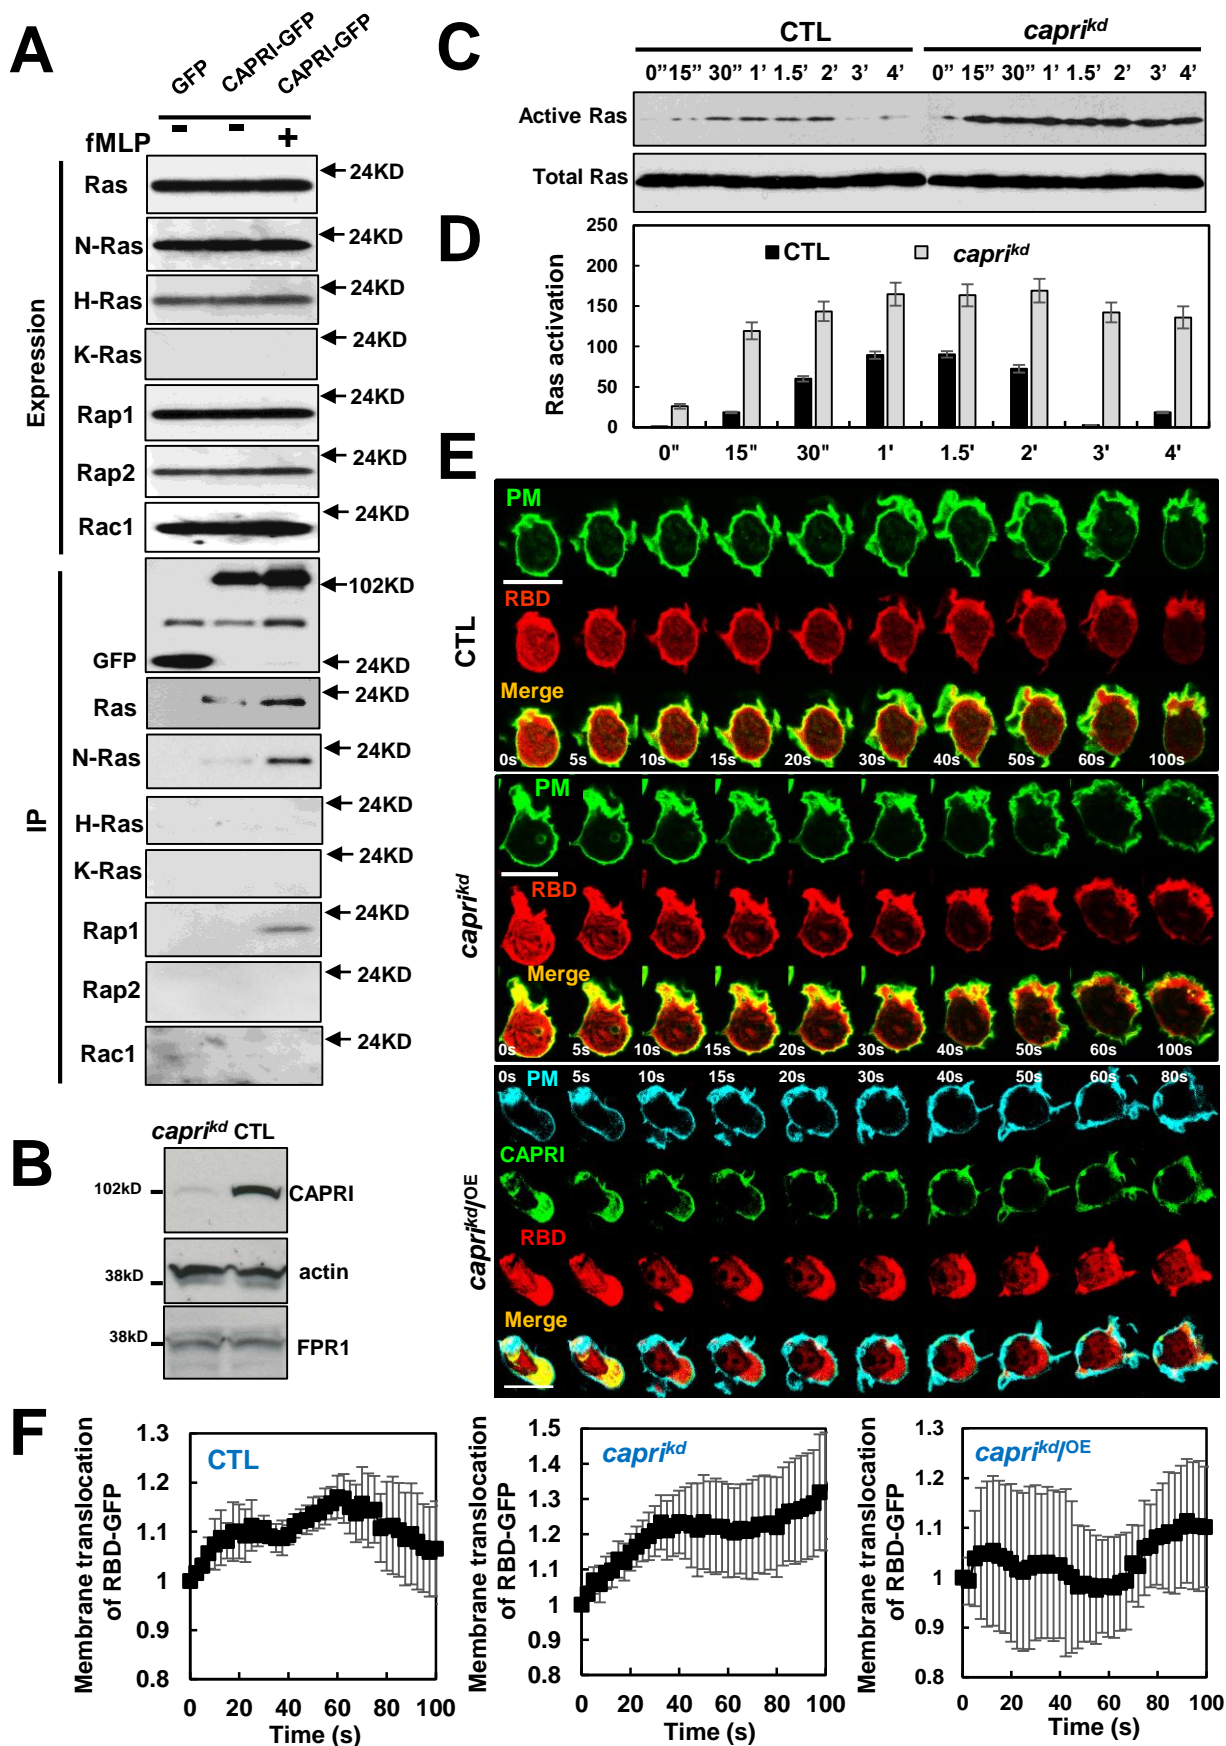



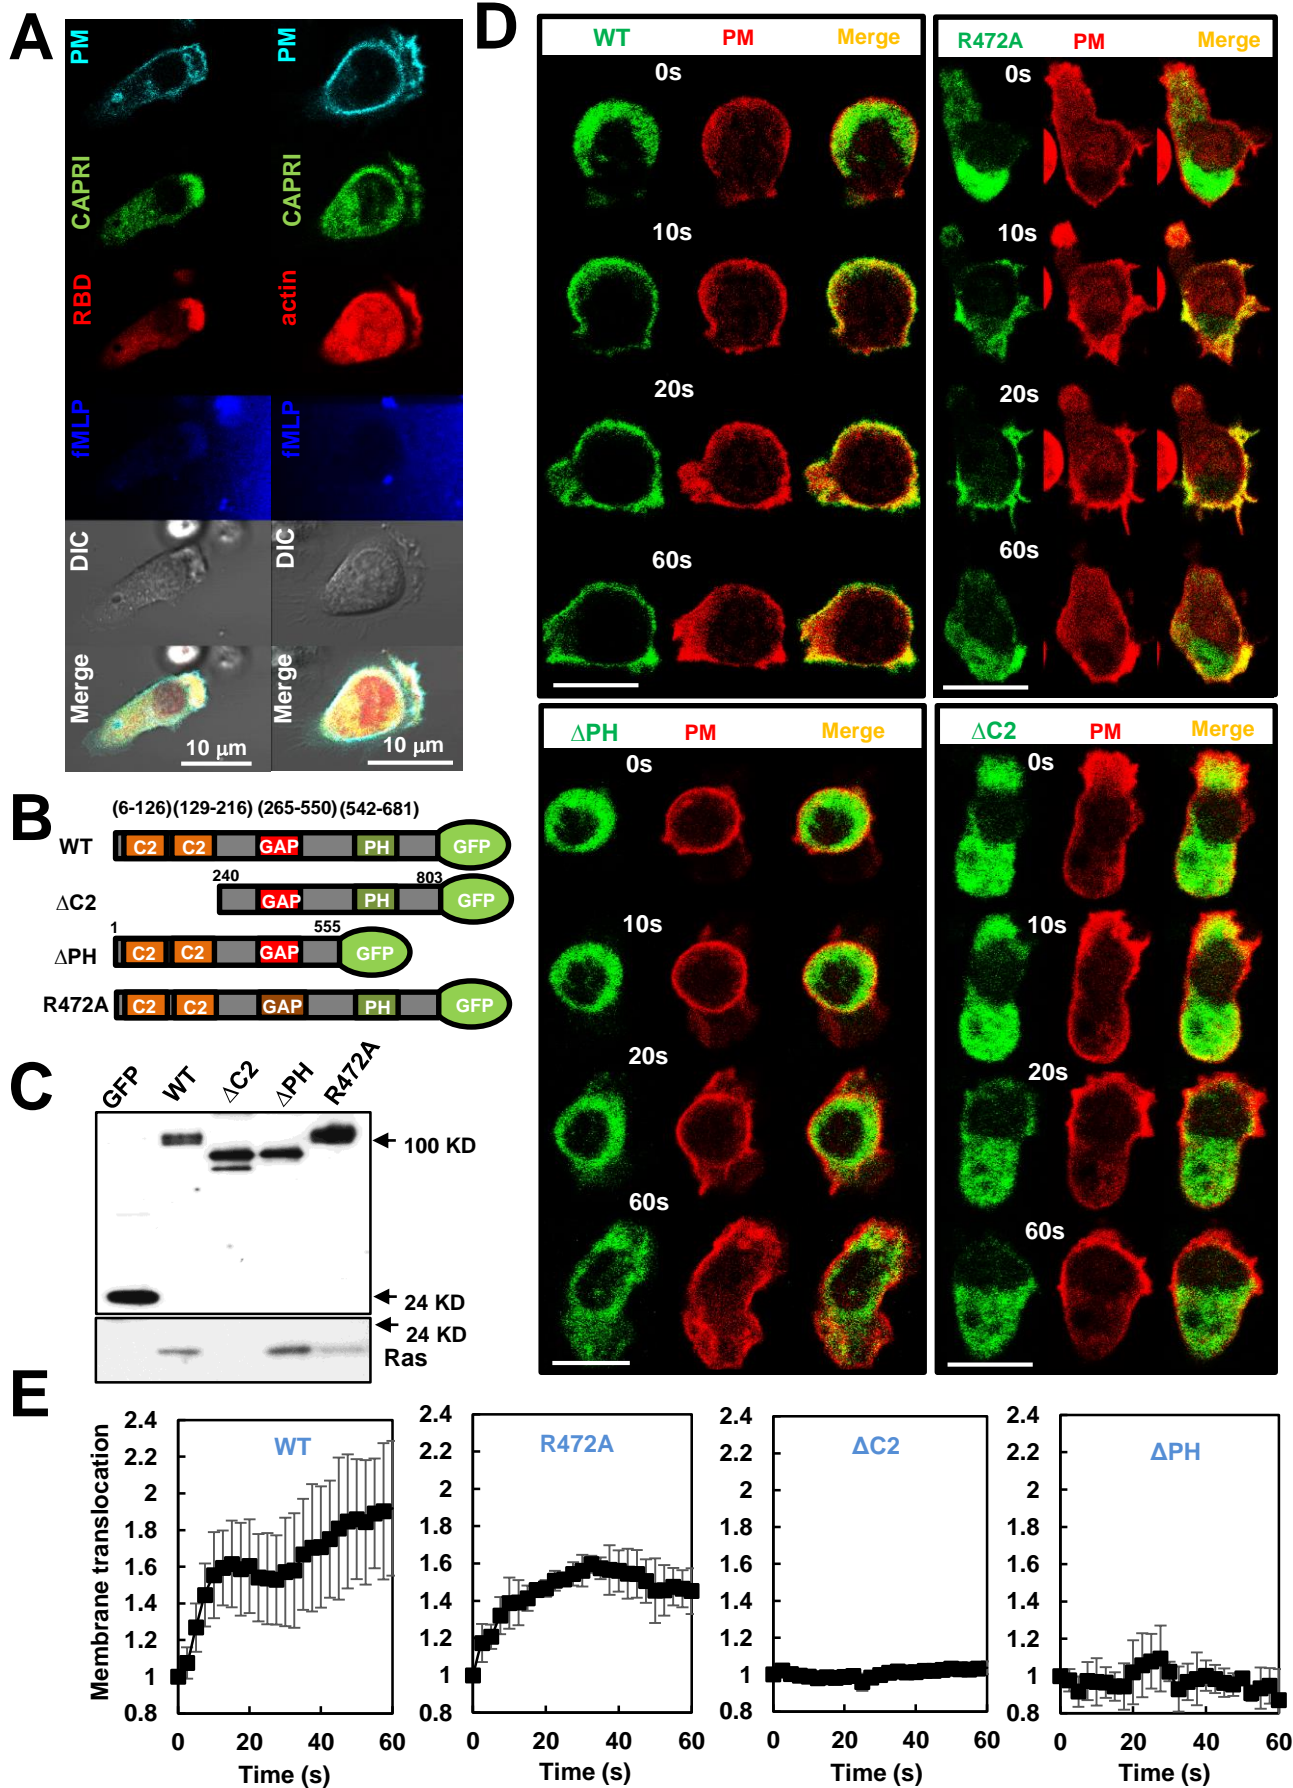

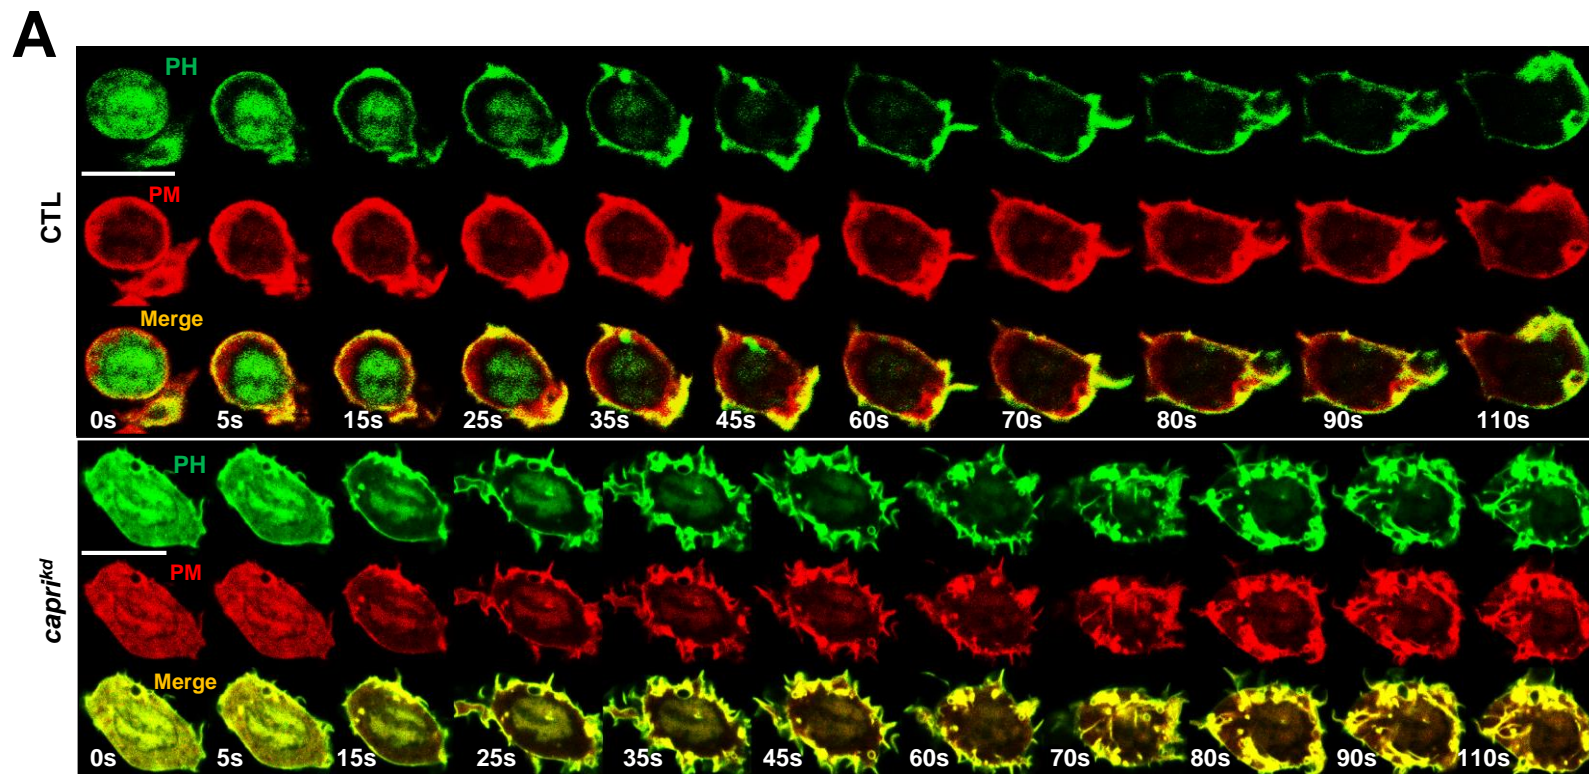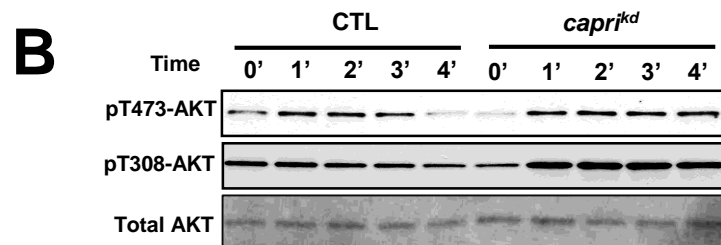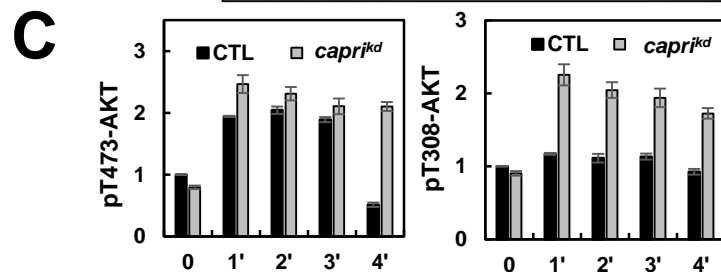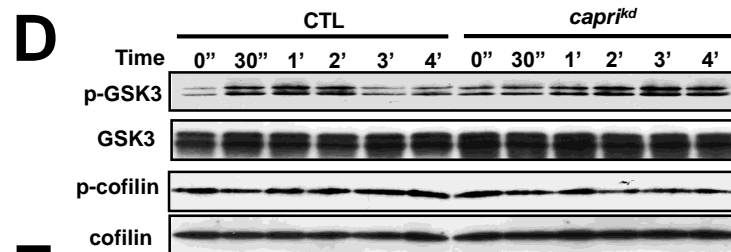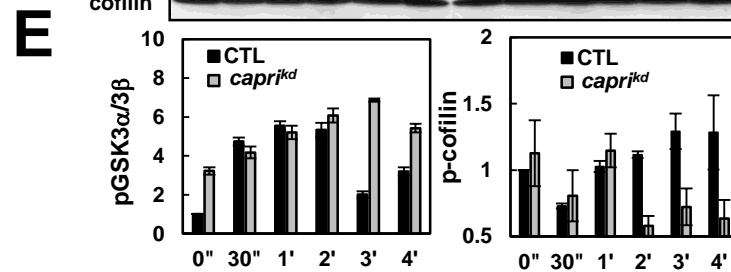

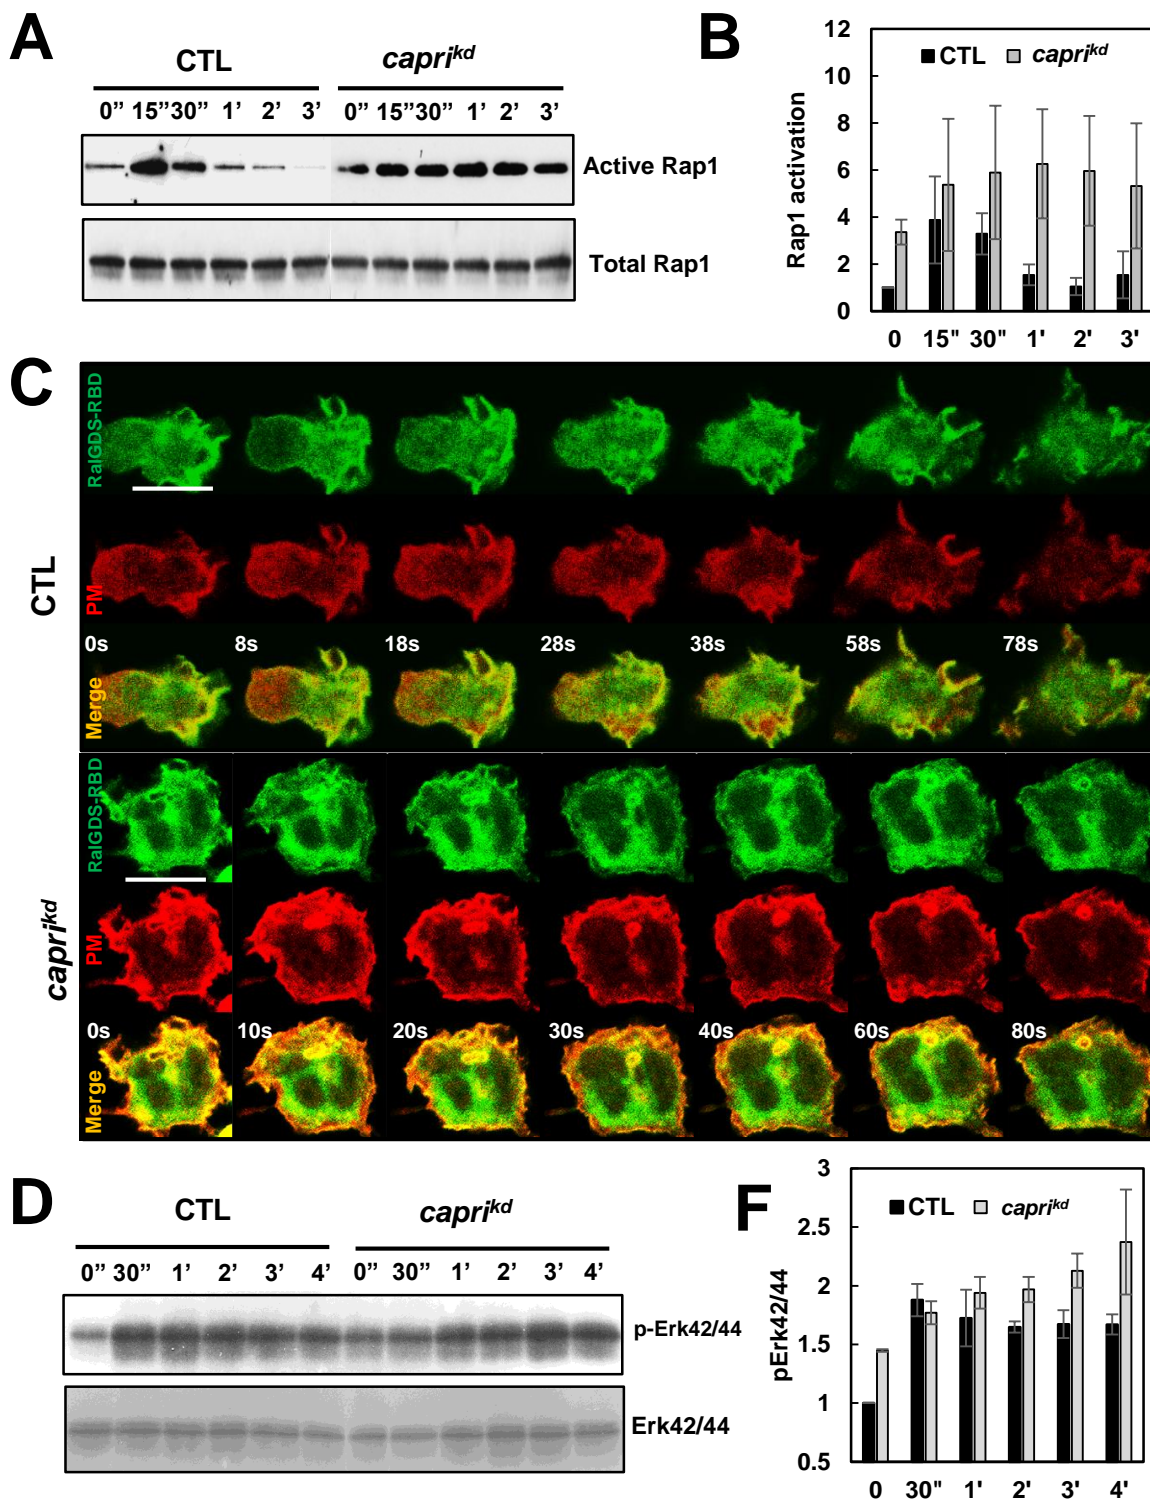



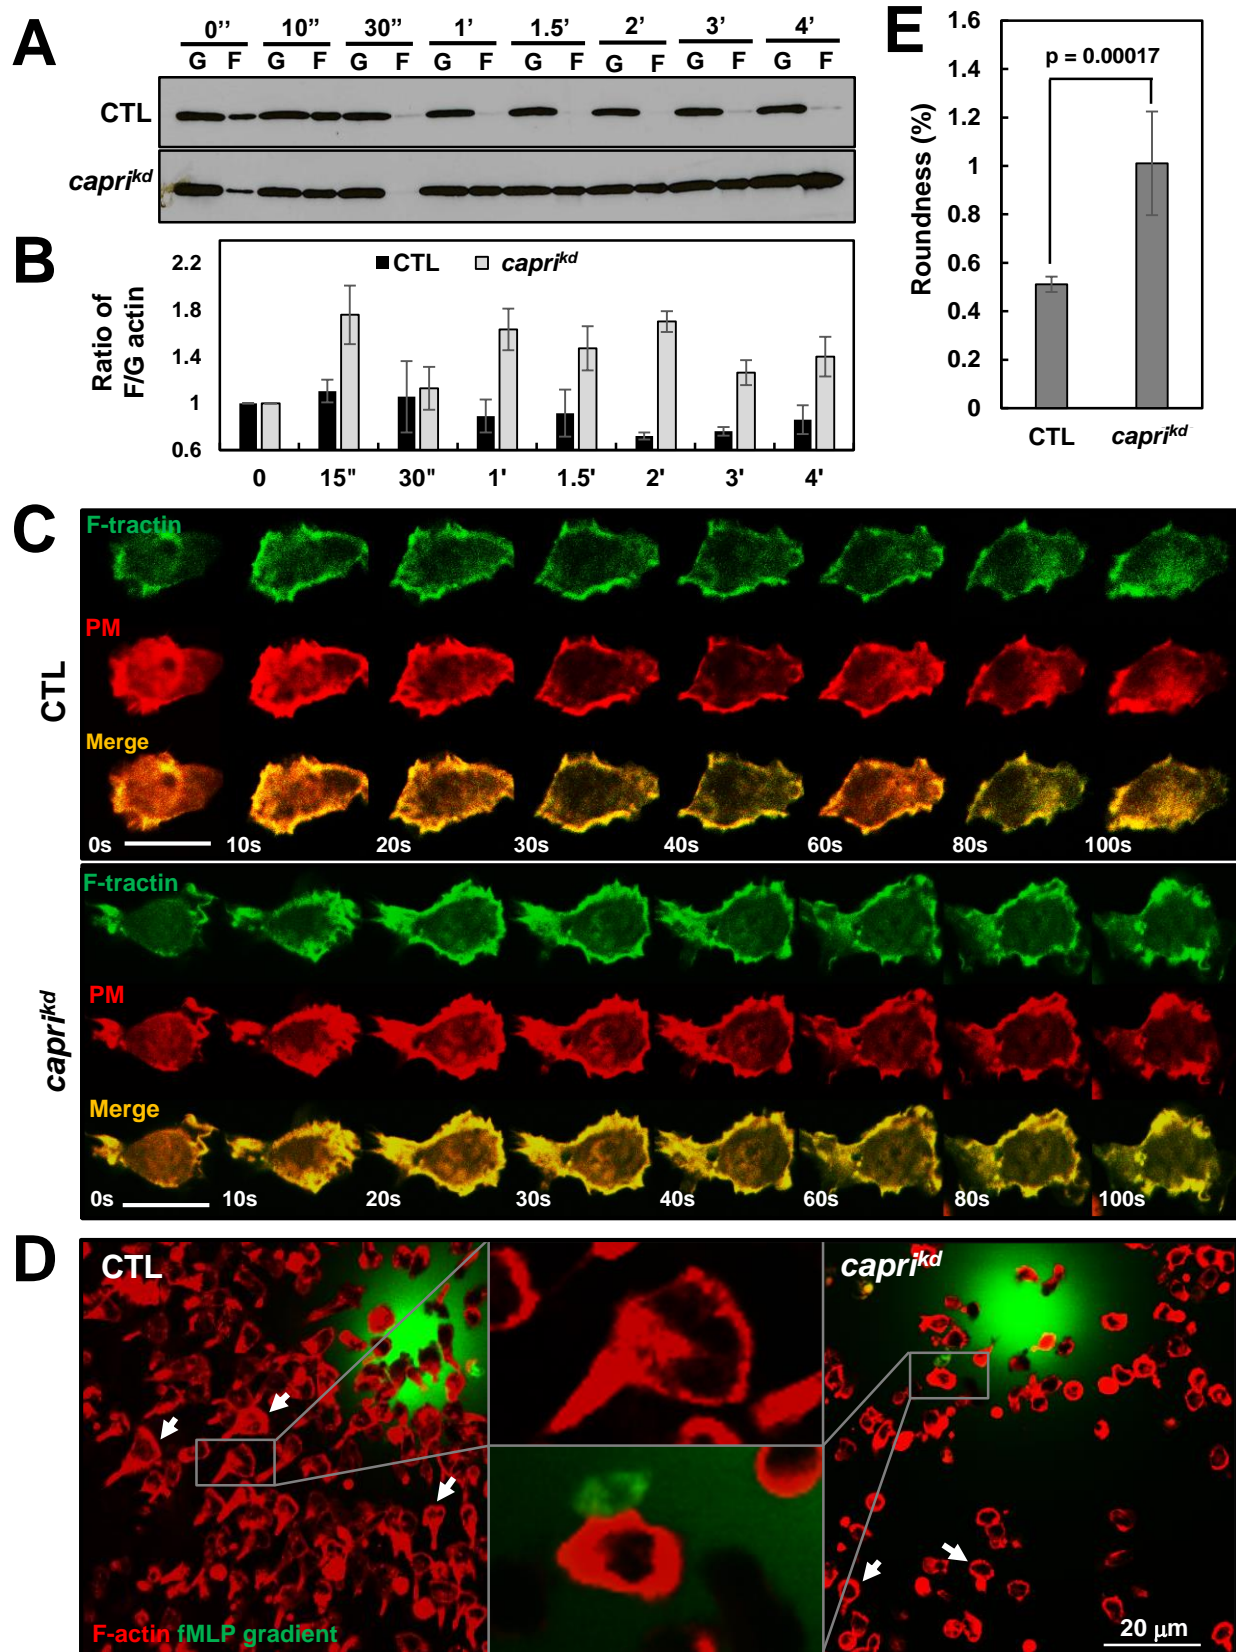

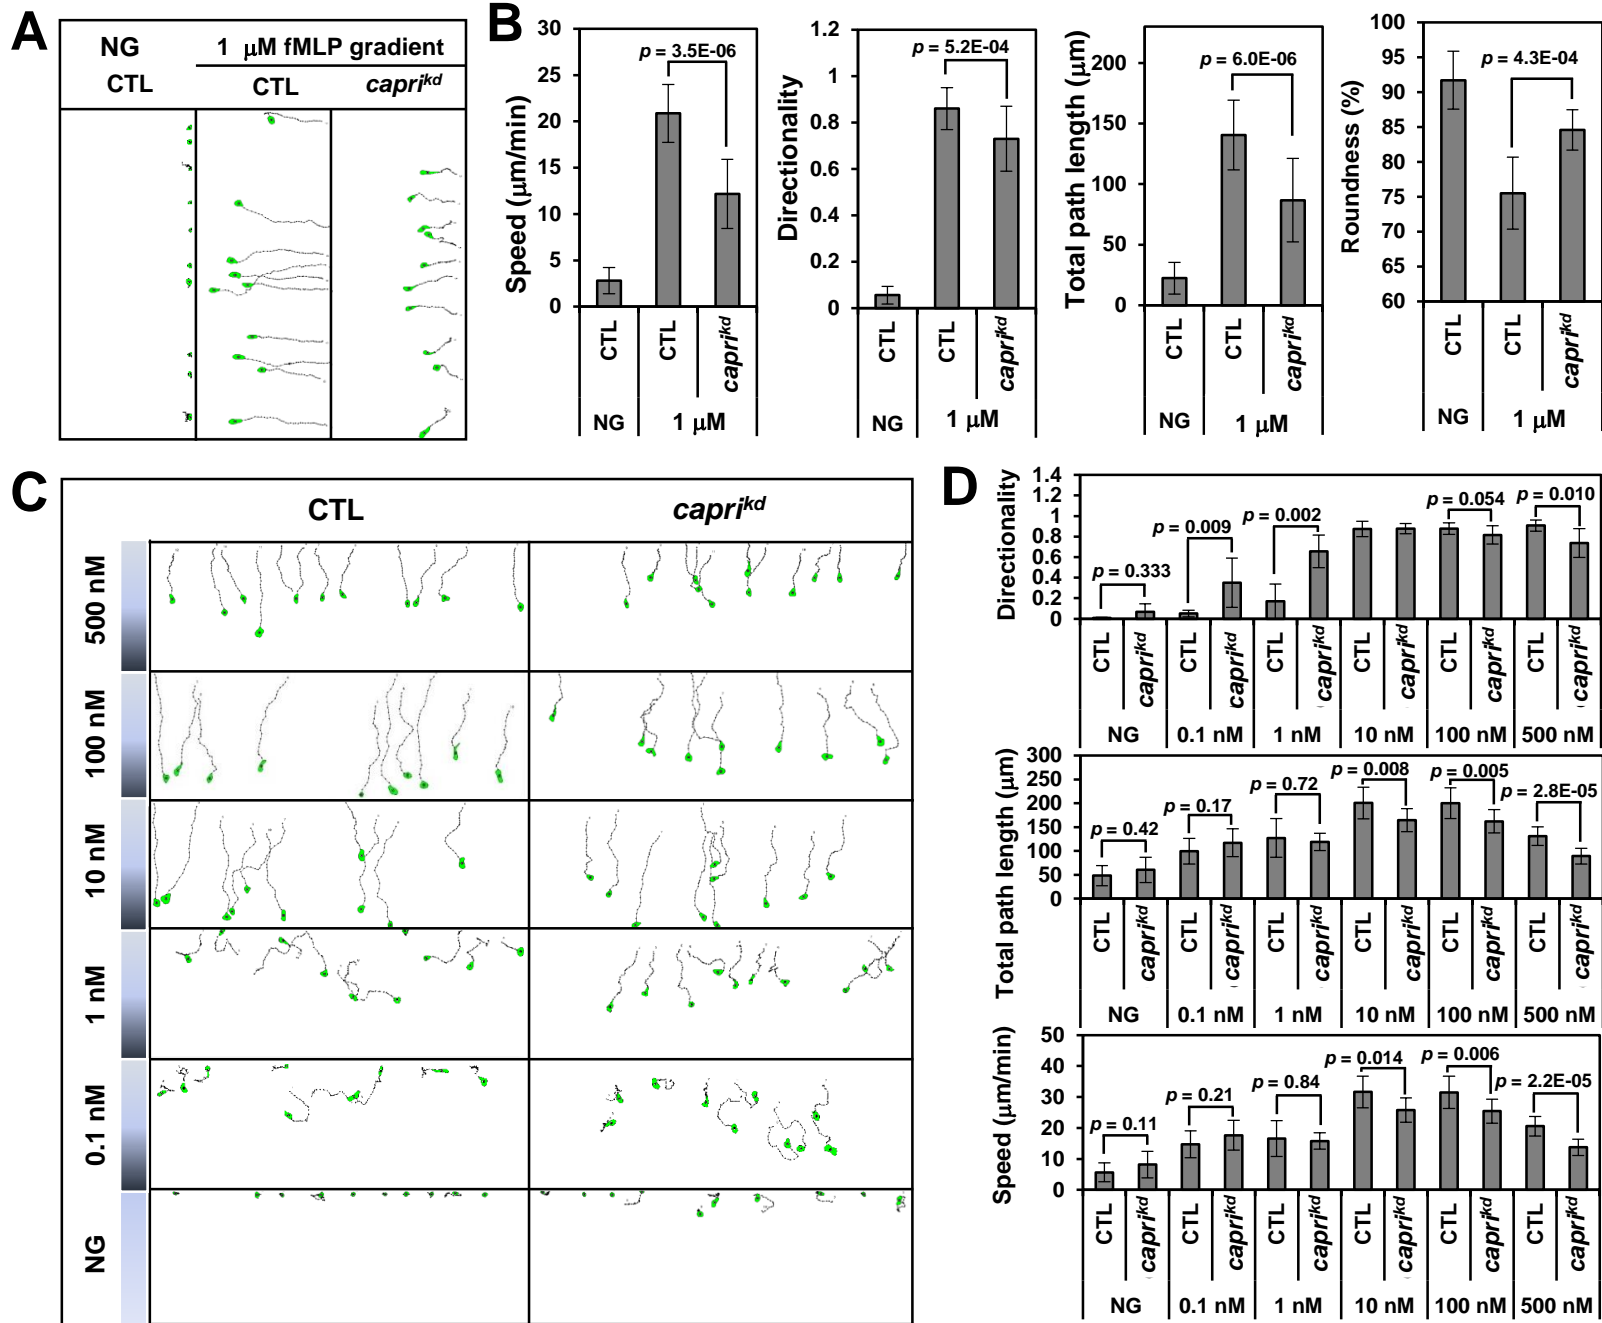

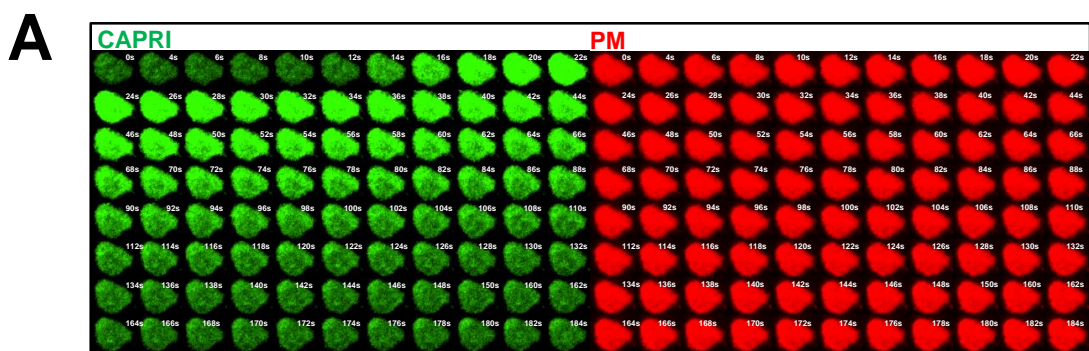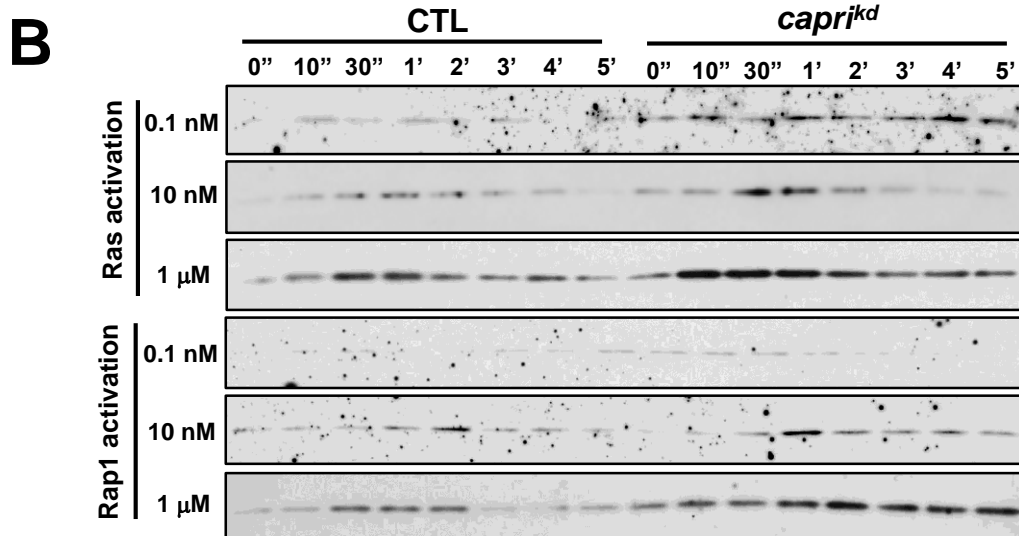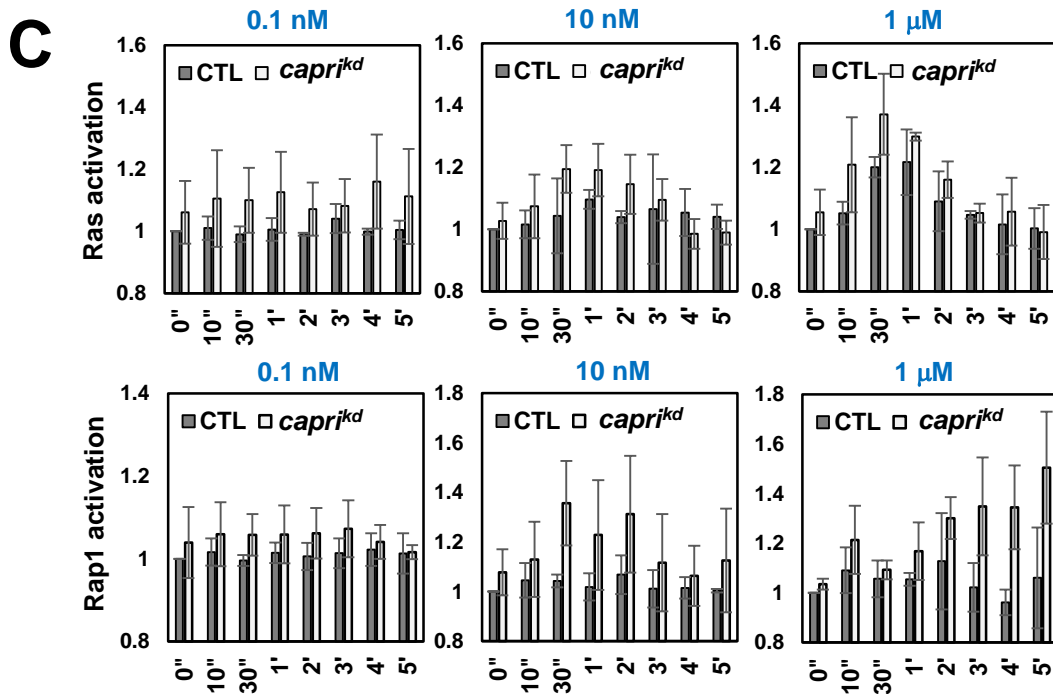



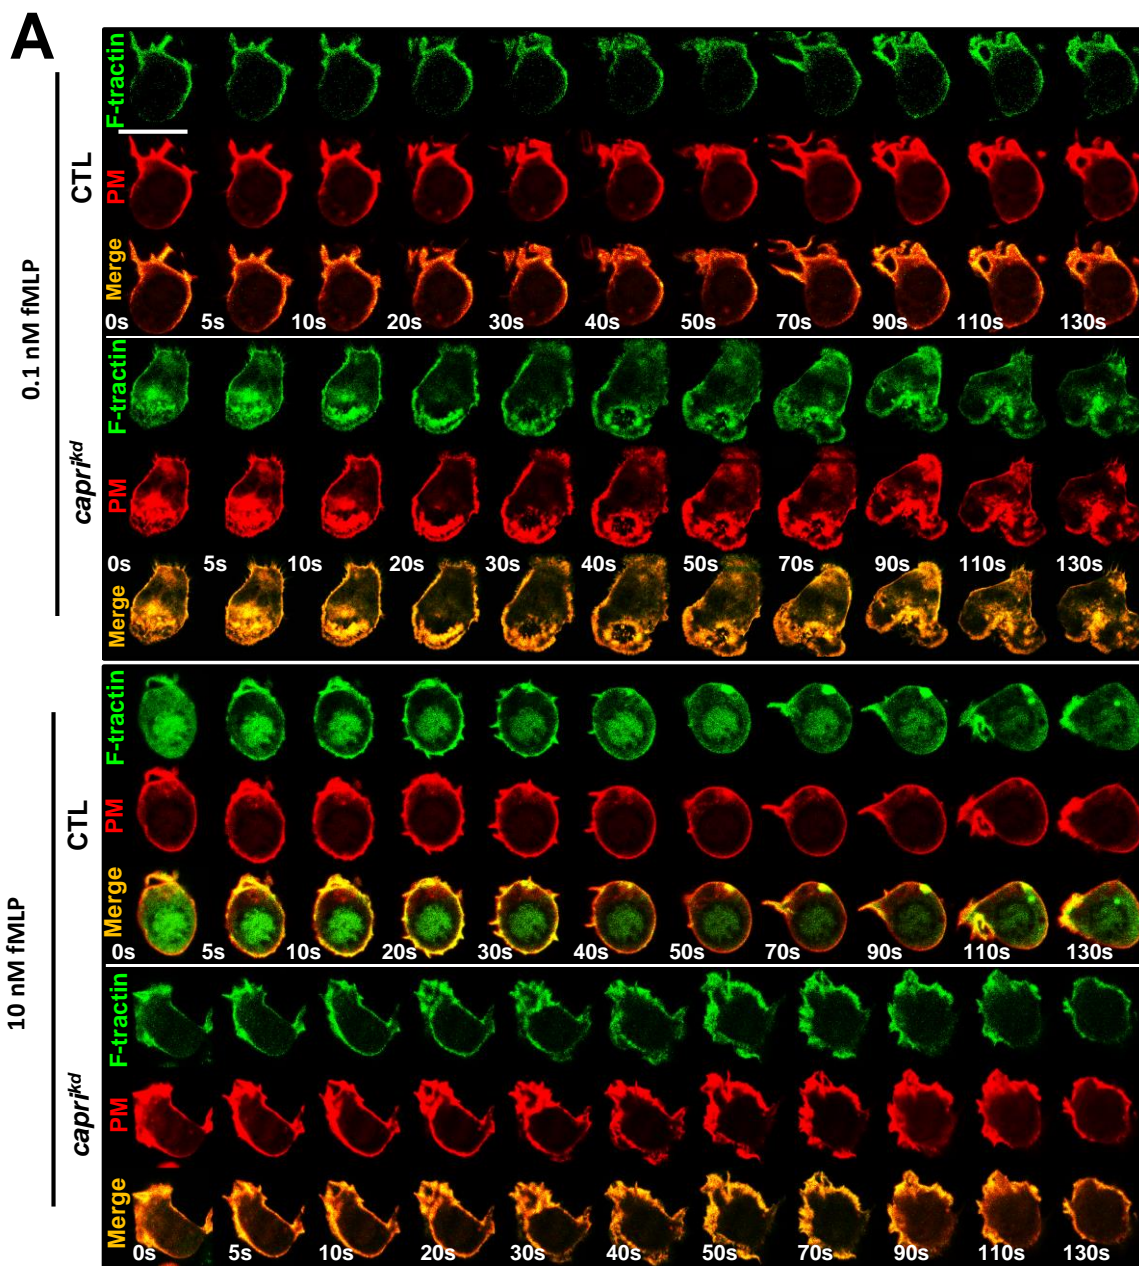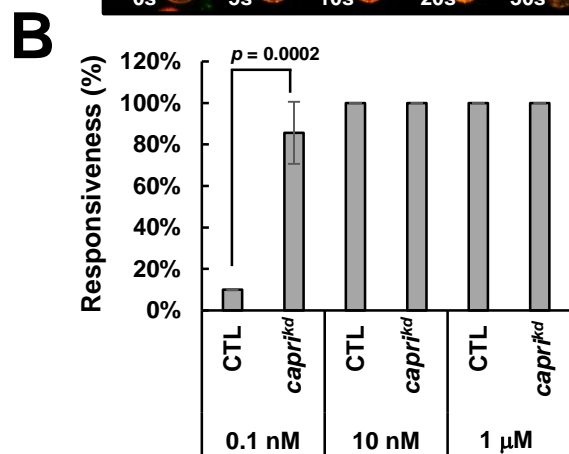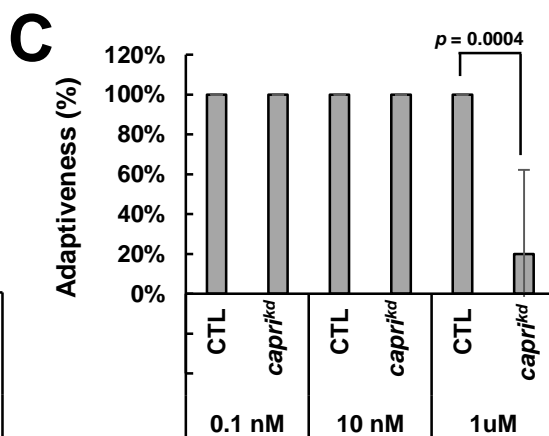

Source: https://www.biorxiv.org/content/10.1101/2020.04.23.058131v1.full.pdf
